# Supplementary material for: Topological motifs in dicyanamides of transition metals
Source: Royal Society of Chemistry journal article supplement (doi:10.1039/d2ce00485b), 2022-01-01
Supplement: d2ce00485b1.xlsx [file d2ce00485b1.xlsx]

## Sheet: Table S1
Table S1. Full list of previously reported metal dicyanamides.
M1, M2 - metal atom; CF - Coordination figure; CN - coordination number;							Coordination mode of:
Refcode	M1	CN1	CF1	M2	CN2	CF2	Anion	Ligand	Ligand2	CoordFormula	Dimensionality	topology	interpenetration
217352	Co(II)	6	octahedron				B2	M1		A*B2)2*M1)2	1D	2,4C4
600015	Ni(II)	6	octahedron				B2	M3, M1		A*B2*M3*M1	3D	dia	class IIa Z = 2
604158	Cu(II)	6	octahedron				B2	M1		A*B2)2*M1)2	1D	2,4C4
640030	Mn(II)	6	octahedron				M1	M1		A*M1)6	0D	0D
641646	Tb(III)	8	bicapped trigonal prism				B2, B2, B2	M1, M1		A*B2)3*M1)2	2D	sql
1172906	Zn(II)	4	tetrahedron				B2			A*B2)2	2D	sql
1185495	Ag(I)	6	octahedron				T6			A*T6	3D	pcu
1288915	Pb(II)	9	tricapped trigonal prism				T5, T4			A*T5*T4	3D	4,5,9T2
843	Ag(I)	6	octahedron				B6			A*B6	3D	pcu
85617	Ni(II)	6	octahedron				T3			A*T3)2	3D	rtl
85618	Co((I)	6	octahedron				T3			A*T3)2	3D	rtl
85619	Co(II)	6	octahedron				T3			A*T3)2	3D	rtl
92075	Mn(II)	6	octahedron				T3			A*T3)2	3D	rtl
92077	Mn(II)	6	octahedron				T3			A*T3)2	3D	rtl
92076	Mn(II)	6	octahedron				T3			A*T3)2	3D	rtl
411361	Mg(II)	6	octahedron				T3			A*T3)2	3D	rtl
416002	Gd(III)	9	tricapped trigonal prism				T3, T3			A9*T3)3	3D	3,3,9T1
425113	Li(I)	6, 4	octahedron, square				T5			A*T5)2	3D	NewTopology|10000001
EJACAW	Cu(II)	5	trigonal bipyramid				M1	T101		A*T101*M1	0D	1M2-1
EKUYIV	Sm(III)	9	tricapped trigonal prism				M1	K02, B01	M1	A*K02*B01*M1)3	1D	2C1
EKUYOB	Eu(III)	9	tricapped trigonal prism				M1	K02, B01	M1	A*K02*B01*M1)3	1D	2C1
HUVPOG	Mn(II)	6	octahedron				M1	M1		A*M1)6	0D	0D
HUXKAP	Co(II)	6	octahedron				M1	M1		A*M1)6	0D	0D
HUXKET	Ni(II)	6	octahedron				M1	M1		A*M1)6	0D	0D
HUXKIX	Cu(II)	6	octahedron				M1	M1		A*M1)6	0D	0D
HUXKUJ	Cu(II)	6	octahedron				M1	M1		A*M1)6	0D	0D
IKOWAJ	Ni(II)	5, 5	square pyramide				B2	K0101	M2	A)2*K0101*B2*M2	2D	sql
NADXAV	Co(II)	6	octahedron				B2	K0001		A*K0001*B2	1D	2C1
PAGQIB	Zn(II)	6, 6	octahedron				B2, M1, M1, M1	T3	M1	A)2*T3)2*B2*M1)4	2D	3,4L147
SADWAZ	Cu(II)	4	square	Zn(II)	6	octahedron	0, M1	K0101		A)3*K0101)2*M1)2	0D	1,1,2M-1
SADWED	Cu(II)	4	square	Cd(II)	6	octahedron	0, M1	K0101		A)3*K0101)2*M1)2	0D	1,1,2M-1
SAHXOS	Cd(II)	6	octahedron				M1	K4	M1	A*K4*M1)2	2D	sql
ABUZON	Cd(II)	6, 7	octahedron, capped trigonal prism				B2	T11	M1	A)3*T11)4*B2)2*M1)4	2D	3,4L99
ADAFAN	Zn(II)	6	octahedron				B2	M1		A*B2*M1)4	1D	2C1
ADAFAN01	Zn(II)	6	octahedron				B2	M1		A*B2*M1)4	1D	2C1
AFEGOJ	Ni(II)	6	octahedron				M1, M1	K0001		A*K0001*M1)2	0D	0D
AGIGUT	Cu(II)	5, 5	square pyramide				B2	T101		A)2*T101)2*B2	1D	2C1
AGUFUG	Mn(II)	6	octahedron				M1	K0001	M1	A*K0001*M1)2	0D	0D
AJIJIN	Ni(II)	6	octahedron				B2	M1		A*B2)2*M1)2	2D	sql
AJOCOU	La(III)	9, 8	square antiprism				T3, B2, B2, B2, B2	M1		A)3*T3)2*B2)6*M1)8	3D	NewTopology
AJOCUA	Yb(III)	8, 8	square antiprism				M1	M1		A*M1)8	0D	0D
AJODEL	Tb(III)	8	square antiprism				M1	M1		A*M1)8	0D	0D
AJODIP	La(III)	8	square antiprism				B2	M1		A*M1)8	0D	0D
ALAJAA	Cu(II)	5	square pyramide				B2, M1	B01		A*B2*B01*M1	0D	1M2-1
ALAJAA01	Cu(II)	5	square pyramide				B2, M1	B01		A*B2*B01*M1	0D	1M2-1
ALAJEE	Cu(II)	5	square pyramide				B2, M1	B01		A*B2*B01*M1	1D	2C1
ALAJII	Cu(II)	6, 6, 6, 6	octahedron				B2, B2	B21		A*B21*B2	1D	2C1
AQELOX	Ru(III)	5, 5, 5, 5, 5, 5	square pyramide				M1	B2		A*B2)2*M1	0D	1,1,2M-1
AQOGUJ	Cu(II)	5	square pyramide				B2	G002		A)2*G002*B2)2	1D	(4,4)(0,2)
AREKEN	Cu(II)	6	octahedron				M1	M1		A*M1)6	0D	0D
ASIROJ	Mn(II), Mn(III)	6, 6, 6	octahedron				B2, B2, B2, B2	B11	M3	A)3*B2)3*B11)3*M3	3D	3,4,6,6T1
ASOXEL	Ni(II)	6	octahedron				M1, M1	B02		A*B01)2*M1)2	0D	0D
ATAMUF	Co(II)	5, 5	square pyramid	Cu	4, 4	Tetrahedron	B2, M1	K101		A)2*K101*B2)2*M1)2	3D	KIb
ATANAM	Ni(II)	6, 6	octahedron	Cu	4, 4, 4, 3	tetrahedron. Triangle	T3, M1	K101		A)6*K101)4*T3)2*M1)5	1D	(4,4)(0,2)
ATARET	Mn(II)	7	capped trigonal prism				M1	P00001	M1	A*P00001*M1)2	0D	0D
ATEJAM	Ag(I)	4, 4	tetrahedron	Ni	6	octahedron	B2, M1, M1	K101	M1	A)3*K101)2*B2*M1)4	1D	2C1
ATOGIZ	Zn(II)	5	trigonal bipyramid				B2	B11		A*B2*B11	2D	hcb
AVEHUG	Mn(II), Mn(III)	5, 6, 6	trigonal bipyramid, octahedron				B2	B21	M1	A)3*B21)2*B2*M1)7	1D	2C1
AXIGAR	Co(II)	6, 6	octahedron				M1, M1, B2, B2, B2	M1		A)2*B2)3*M1)6	3D	ths
AZEBAK	Mn(II)	6	octahedron				M1	B2	M1	A*B2*M1)4	1D	2C1
AZEBAK01	Mn(II)	6, 6	octahedron				M1	B2	M1	A*B2*M1)4	1D	2C1
AZIPIJ	Co(II)	6	octahedron				M1	B01	M1	A*B01)2*M1)2	0D	0D
BAGPIJ	Cu(II)	5	square pyramide				M1	T001	M1	A*T001*M1)2	0D	0D
BAGPOP	Cu(II)	5	square pyramide				B2, M1	B01		A*B2*B01*M1	1D	2C1
BAGPOP01	Cu(II)	5	square pyramide				B2, M1	B01		A*B2*B01*M1	1D	2C1
BAJWIT	Fe(II)	7	capped trigonal prism				B2	B01	M1	A*B2*B01)2*M1	1D	(4,4)(2,2)
BALKUV	Ni(II)	6	octahedron				B2	B01		A*B2*B01)2	1D	2C1
BALKUV01	Ni(II)	6	octahedron				B2	B01		A*B2*B01)2	1D	2C1
BALKUV02	Ni(II)	6	octahedron				B2	B01		A*B2*B01)2	1D	2C1
BAQXUO	Cu(II)	5, 5, 5	square pyramide				B2	T11	M3, M1	A)3*T11)3*B2*M3*M1	1D	3,4C35
BARHEH	Ni(II)	6	octahedron				M1	K0001		A*K0001*M1)2	0D	0D
BARHUX	Ni(II)	6	octahedron				M1, M1	K0001		A*K0001*M1)2	0D	0D
BARHUX01	Ni(II)	6	octahedron				M1, M1	K0001		A*K0001*M1)2	0D	0D
BASHAF	Mn(II)	6	octahedron				B2			A*B2)3	3D	pcu
BASHEJ	Co(II)	6	octahedron				B2			A*B2)3	3D	pcu
BASHIN	Mn(II)	6	octahedron				B2			A*B2)3	3D	pcu
BASHOT	Fe(II)	6	octahedron				B2			A*B2)3	3D	pcu
BEBHAS	Cu(II)	5	square pyramide				B2	B01	M1	A*B2*B01*M1	1D	2C1
BENKUC	Cd(II)	6	octahedron				M1, M1	B01		A*B01)2*M1)2	0D	0D
BEXQIF	Fe(II)	6, 6	octahedron				B2, B2, B2, B2, B2, B2			A*B2)3	3D	bnn
BEXQOL	Co(II)	6, 6	octahedron				B2, B2, B2, B2, B2, B2			A*B2)3	3D	bnn
BEXQUR	Ni(II)	6, 6	octahedron				B2, B2, B2, B2, B2, B2			A*B2)3	3D	bnn
BEXRAY	Mn(II)	6, 6	octahedron				B2, B2, B2, B2, B2, B2			A*B2)3	3D	bnn
BEXREC	Co(II)	6, 6	octahedron				B2, B2, B2, B2, B2, B2			A*B2)3	3D	bnn
BEXRIG	Ni(II)	6, 6	octahedron				B2, B2, B2, B2, B2, B2			A*B2)3	3D	bnn
BEYBIR	Ni(II)	6, 6	octahedron				B2	B01		A*B2*B01)2	1D	2C1
BEZKIB	Mn(II)	6, 6	octahedron				M1, M1	M1	M1	A*M1)6	0D	0D
BIDDUP	Cu(II)	4, 4	tetrahedron				M1, M1	T001		A*T001*M1	0D	0D
BIDFAX	Cu(II)	4	tetrahedron				M1	T001		A*T001*M1	0D	0D
BIKDEF	Co(II)	6	octahedron				B2	B2		A*B2)3	3D	mab
BIKDIJ	Cu(II)	6	octahedron				B2	B2		A*B2)3	3D	mab
BIKDOP	Fe(II)	6	octahedron				B2	B2		A*B2)3	3D	mab
BIKDUV	Mn(II)	6	octahedron				B2	B2		A*B2)3	3D	mab
BIKFAD	Ni(II)	6	octahedron				B2	B2		A*B2)3	3D	mab
BILRUK	Cu(II)	5	trigonal bipyramid				B2, M1	B01		A*B2*B01*M1	1D	2C1
BILRUK01	Cu(II)	5, 5, 5, 5	trigonal bipyramid				B2, B2, B2, B2, M1, M1, M1, M1	B01		A*B2*B01*M1	1D	2C1
BINQEV	Fe(II)	6	octahedron				B2, M1	T001		A*T001*B2*M1	0D	2M4-1
BIWVAF	Mn(II)	6	octahedron				M1, M1	B2, M1		A*B2*M1)4	1D	2C1
BIWXOU10	Nd(III)	7	capped trigonal prism				B2, M1, M1	M1		A*B2*M1)5	1D	2C1
BIWYAH10	Nd(III)	8	square antiprism				B2, B2, B2	M1		A*B2)3*M1)2	3D	dia
BOCBUR	Cd(II)	6	octahedron				B2	B01	M2	A*B2*B01*M2	1D	(4,4)(0,2)
BOCCAY	Cd(II)	6	octahedron				B2	B01	M2	A*B2*B01*M2	1D	(4,4)(0,2)
BOCCEC	Cd(II)	6	octahedron				B2	B01	M2	A*B2*B01*M2	2D	hcb
BOCFAC	Mn(II)	6, 6, 6, 6, 6, 6	octahedron, capped trigonal prism				B2, B2	K02	B21, M1	A)6*K02*B2)3*B21)4*M1)10	1D	(4,4)(4,4)
BOCFEG	Mn(II)	5, 6, 6	squarel pyramid, octahedron				B2, B2	B21	M1	A)3*B21)2*B2)2*M1)5	2D	sql
BOCFIK	Mn(II)	5, 6, 6	squarel pyramid, octahedron				B2, B2	B21	M1	A)3*B21)2*B2)2*M1)5	2D	sql
BOCFOQ	Mn(II)	5, 6, 6	squarel pyramid, octahedron				B2, B2	B21	M1	A)3*B21)2*B2)2*M1)5	2D	sql
BOFGAH	Zn(II)	4, 5	tetrahedron, square pyramid				B2, B2, M1	K0101		A)2*K0101*B2*M1	0D	1,2,2,3M10-1
BOFGEL	Zn(II)	4, 5, 5	tetrahedron, square pyramid				B2, M1	K0101, K0001	M1	A)3*K0101*K0001*B2*M1)2	0D	1,1,2,3M6-1
BOMKUM	Co(II)	6	octahedron				M1, M1	B01		A*B01)2*M1)2	0D	0D
BOWZIX	Co(II)	6	octahedron				M1	B2	M1	A*B2*M1)4	1D	2C1
BUJWAF	Fe(II)	6	octahedron				B2, B2	B2		A*B2)3	3D	pcu
BUJWAF01	Fe(II)	6	octahedron				B2, B2	B2		A*B2)3	3D	pcu
BUJWAF02	Fe(II)	6	octahedron				B2, B2	B2		A*B2)3	3D	pcu
BUKBUE	Co(II)	6	octahedron				B2, B2	B2		A*B2)3	3D	pcu
BUKJIA	Zn(II)	6	octahedron				B2, B2	B2		A*B2)3	2D	sql
BUSXOD	Mn(II), Mn(III)	6, 6	octahedron				B2	T22, B11	M1	A)2*T22*B2*B11*M1	1D	(4,4)(0,2)
BUXFUW	Ni(II)	6	octahedron				B2, B2	B01		A*B2)2*B01	3D	dia
CADLEZ	Cu(II)	5	trigonal bipyramid				M1	B01		A*B01)2*M1	0D	0D
CADQUV	Cu(II)	5, 5	square pyramid				B2	K0001		A)2*K0001)2*B2	0D	1,1,2M-1
CADRAC	Cd(II)	6, 6	octahedron				B2	K0001	M1	A)2*K0001)2*B2*M1)2	0D	1,1,2M-1
CAHKUT	Cu(II)	5	square pyramid				M1	T101		A*T101*M1	0D	1,2M4-1
CAHLAA	Cu(II)	5	square pyramid				M1	T101		A*T101*M1	0D	1,2M4-1
CAPPEQ	Co(II)	6	octahedron				B2	M1		A*B2)2*M1)2	1D	2,4C4
CAPPIU	Mn(II)	6	octahedron				B2	M1		A*B2)2*M1)2	1D	2,4C4
CAZZOV	Fe(II)	6	octahedron				M1	B01		A*B01)2*M1)2	0D	0D
CEJRAN	Cu(II)	5	square pyramid				B2, M1	B01	M2, M1	A)2*B2*B01)2*M2*M1)2	1D	2C1
CEMHIO	Cd(II)	6, 6	octahedron				B2, B2, B2			A*B2)3	2D	sql
CERGAH01	Mn(II)	6	octahedron				B2	B01		A*B2)2*B01	1D	2,4C4
CERGIP	Mn(II)	7, 7	pseudo-octahedron				B2, B2	B01	M1	A*B2)2*B01*M1	1D	(4,4)(2,2)
CIFLEL	Cu(II)	5	trigonal bipyramid				B2	T001		A*T001*B2	1D	2C1
CIGSUI	Cu(II)	6	octahedron				B2	T11	M1	A*T11*B2*M1	3D	dia
CIGTAP	Cu(II)	6, 6, 5	octahedron, square pyramid				B2, M1	T11		A)5*T11)4*B2)6*M1)4	1D	3,4,6C1
CIKWAU	Cu(I)	4, 3	tetrahedron, triangle				B2, M1			A)2*B2)2*M1)3	1D	2C1
CIKWEY	Cu(I)	4	square				B2, B2			A*B2)2	2D	sql
CIWVAG	Zn(II)	5	square pyramid				M1	K0001		A*K0001*M1	0D	0D
COBPUG	Cu(II)	6	octahedron				M1	B01		A*B01)2*M1)2	0D	0D
COBQAN	Ni(II)	6	octahedron				M1	B01		A*B01)2*M1)2	0D	0D
COCDOQ	Mn(II)	6	octahedron				B2	K4		A)2*K4*B2)4	3D	sqc173
COGVAY	Mn(II)	6	octahedron				B2	M1		A*B2)2*M1)2	1D	2,4C4
COGVEC	Cu(II)	6	octahedron				B2	M1		A*B2)2*M1)2	1D	2,4C4
COGXUU	Co(II)	6	octahedron				B2	M1		A*B2)2*M1)2	1D	2,4C4
COGYAB	Zn(II)	6	octahedron				B2	M1		A*B2)2*M1)2	1D	2,4C4
COGYEF	Cd(II)	6	octahedron				B2	M1		A*B2)2*M1)2	1D	2,4C4
COJQEY	Cu(II)	5	trigonal bipyramid				B2	T001		A*T001*B2	1D	2C1
CONSEG	Cu(II)	5	square pyramid	Tb(III)	9	TTP	B2, B2, B2	G0002		A)2*G0002*B2)3	2D	hcb
CONSIK	Cu(II)	5	square pyramid	Gd(III)	9	TTP	B2, B2, B2	G0002		A)2*G0002*B2)3	2D	hcb
CONSOQ	Cu(II)	5	square pyramid	Dy(III)	9	TTP	B2, B2, B2	G0002		A)2*G0002*B2)3	2D	hcb
COYHOP	Mn(II)	6	octahedron				B2	M1		A*B2)2*M1)2	1D	2,4C4
CUJYOY	Ag(I)	3, 4	tetrahedron, triangle				B2	B2	M1	A)2*B2)3*M1	1D	2,4C4
CUMYOA	Co(II)	6	octahedron				B2	M1	M1	A*B2*M1)4	1D	2C1
CUMYUG	Mn(II)	6	octahedron				B2, B2	B01		A*B2)2*B01	2D	hcb
CUMZAN	Zn(II)	5	trigonal bipyramid				B2	B3		A*B3*B2	3D	seh-3,5-P21/c
CUMZOB	Mn(III)	6	octahedron				B2	B01		A*B2*B01)2	1D	2C1
CURRUF	Co(II)	6	octahedron				B2, B2, B2, T3			A)3*T3)2*B2)6	3D	NewTopology
CURSAM	Ni(II)	6	octahedron				B2, B2, B2, T3			A)3*T3)2*B2)6	3D	NewTopology
CUWWIB	Ni(II)	6	octahedron				M1	B2		A*B01)2*M1)2	0D	0D
CUWWOH	Ni(II)	6	octahedron				M1	B2		A*B01)2*M1)2	0D	0D
DACDET	U(VI)	5, 6	flat				B2	B11	M3	A)2*B2*B11)2*M3	1D	2,4C4
DANZEX	Mn(II)	6	octahedron				T3			A*T3)2	3D	rtl
DAPBOL	Mn(II)	6	octahedron				B2	M1		A*B2)2*M1)2	1D	2,4C4
DAPBUR	Mn(II)	6	octahedron				B2	M1		A*B2)2*M1)2	1D	2,4C4
DAPCOM	Fe(II)	6	octahedron				B2	M1		A*B2)2*M1)2	1D	2,4C4
DAPCOM01	Fe(II)	6	octahedron				B2	M1		A*B2)2*M1)2	1D	2,4C4
DAPDAZ	Mn(II)	6	octahedron				B2	M1		A*B2)2*M1)2	2D	sql
DAPGEG	Mn(II)	6, 6	octahedron				B2, B2	M1		A*B2)2*M1)2	2D	sql
DAPGEG01	Mn(II)	6, 6	octahedron				B2, B2	M1		A*B2)2*M1)2	2D	sql
DAPMAK	Mn(II)	6, 6	octahedron				B2, B2	B2		A*B2)3	2D	sql
DAPWOJ	Cd(II)	6	octahedron				B2, B2	B01		A*B2)2*B01	3D	dia
DAYDIT	Co	6	octahedron				0	T001		AT001)2	0D	0D
DAYDIT01	Co	6	octahedron				0	T001		AT001)2	0D	0D
DAYPUQ	Zn(II)	5, 5	square pyramid				M1	P002	M3	A)2*P002*M3*M1	0D	0D
DAZBEM	Cd(II)	6	octahedron				B2	B2		A*B2)3	1D	2,6C1
DEMWOK	Co(II)	6, 6	octahedron				B2, B2, B2	B01		A)2*B2)3*B01)3	2D	sql
DEXYEL	Zn(II)	6	octahedron				M1	B01		A*B01)2*M1)2	0D	0D
DICCIC	Cu(II)	5	square pyramid				M1	T001		A*T001*M1)2	0D	0D
DIDVOC	Cu(II)	6	octahedron				0	T001	T001	AT001)2	0D
DINMAQ	Ni(II)	6	octahedron				B2	M1		A*B2)2*M1)2	2D	sql
DINMEU	Co(II)	6	octahedron				B2	M1		A*B2)2*M1)2	2D	sql
DINMUK	Fe(II)	6	octahedron				B2	M1		A*B2)2*M1)2	2D	sql
DINNAR	Mn(II)	6	octahedron				B2	M1		A*B2)2*M1)2	2D	sql
DINSEB	Cd(II)	6	octahedron				B2, B2, B2			A*B2)3	2D	sql
DINSEB01	Cd(II)	6	octahedron				B2, B2, B2			A*B2)3	2D	sql
DISYEK	Cu(II)	5	square pyramid				M1	T001	M1	A*T001*M1)2	0D	0D
DOCYAW	Mn(II)	6	octahedron				M1	B2		A*B2)2*M1)2		2,4C4
DOGTOJ	Mn(II), Mn(IV)	6, 6	octahedron				B2	K101	M2 M1	A)2*K301*B2*M2*M1)2	2D	3,4,4L48
DOHZOQ	Co(II)	6	octahedron				B2	M1		A*B2)2*M1)2	2D	sql
DOJPOK	Mn(II)	6	octahedron				B2, B2			A*B2)3	3D	pcu
DONGUK	Co(II)	6	octahedron				B2, B2	B01		A*B2)2*B01	2D	hcb
DONYUD	Mn(II)	6	octahedron				B2, B2			A*B2)3	3D	pcu
DONYUD01	Mn(II)	6, 6	octahedron				B2, B2, B2, B2, B2, B2			A*B2)3	3D	pcu
DOQBER	Cu(II)	5	trigonal bipyramid				B2	T11		A*T11*B2	2D	hcb
DOTHIE	Co(II)	6	octahedron				B2	M1		A*B2)2*M1)2	2D	sql
DOTYUJ	Mn(II)	6	octahedron				M1	K0001		A*K0001*M1)2	0D	0D
DUKMAY	Ni(II)	6	octahedron				M1	B01		A*B01)2*M1)2	0D	0D
DUMJAY	Cd(II)	6	octahedron				B2, B2			A*B2)3	2D	sql
DUWZIF	Mn(III)	6	octahedron				B2	K0001		A*K0001*B2	1D	2C1
DUWZIF01	Mn(III)	6	octahedron				B2	K0001		A*K0001*B2	1D	2C1
DUWZOL	Mn(III)	6	octahedron				B2	K0001		A*K0001*B2	1D	2C1
DUXGUA	Fe(II)	6	octahedron				M1	M1		A*M1)6	0D	0D
DUXSIZ	Co(II)	6	octahedron				B2, B2	B2		A*B2)3	2D	hcb
DUXSOF	Cu(II)	6	octahedron				B2, B2	B2		A*B2)3	1D	(4,4)(0,2)
DUXSUL	Zn(II)	6	octahedron				B2	B2		A*B2)3	2D	hcb
DUXTAS	Cd(II)	6, 6	octahedron				B2, B2, B2, B2	B2		A*B2)3	1D	(4,4)(0,2)
DUXTEW	Co(II)	6	octahedron				M1	M1		A*M1)6	0D	0D
DUXTIA	Cu(II)	4, 6	square, octahedron				B2	B2	M1	A)2*B2)4*M1)2	2D	sql
DUXTOG	Zn(II)	4, 6	square, octahedron				B1, M1	B2	M1	A)3*B2)4*M1)6	1D	2,2,4C3
DUXTUM	Cd(II)	6, 6	octahedron				B2, B2	B2		A*B2)3	3D	6T18
DUYHAI	Ni	6, 5, 5, 5	octahedron, square pyramid				B2, M1	H22	T11	A)4*H22*T11)3*B2*M1	2D	3,4,4,4L43
EBAKEY	Mn(II)	6, 6, 6	octahedron				0	H003,	T101, K011	A)9*H003)2*K011)4*T101)4	0D	3M6-2
EBATIL	Co(II)	6	octahedron				B2	M1		A*B2)2*M1)2	2D	sql
EBATOR	Ni(II)	6	octahedron				B2	M1		A*B2)2*M1)2	2D	sql
EBATUX	Mn(II)	6, 6	octahedron				B2	B2, M1		A*B2)3+A*B2)2*M1)2	2D+1D	sql + 2,4C4
EBAVAF	Mn(II)	6, 6	octahedron				B2, B2			A)2*B2)5*B01	3D	tcj-4,6-Imma-1	Class IIa Z=2
EBOXIE	Mn(II)	6, 6, 6	octahedron				B2	B21	M4, M3, M1	A)4*B21)3*B2*M4)2*M3)2*M1)2	2D	3,3,3,4,5,5,5L2
EBUTAW	Fe(II)	6	octahedron				B2, B2, B2	K02		A)2*K02*B2)4	2D	sql
EBUTEA	Fe(II)	6	octahedron				B2, M1	K02		A)2*K02*B2)2*M1)4	2D	hcb
ECAVAF	Zn(II)	5	octahedron				B2, M1	K02		A)2*K02*B2)2*M1)4	1D	(4,4)(0,2)
EDABAM	Re(II)	5, 5	square pyramid				M1	B2	M1	A*B2*M1)3	0D	1M2-1
EDALAW	Cu(II)	5	square pyramid				B2, M1	M1		A*B2*M1)3	1D	2C1
EDEDUN	Cu(II)	6	octahedron				B2, M1			A*B2)2*M1)2	1D	2,4C4
EDEDUN01	Cu(II)	6	octahedron				B2, M1			A*B2)2*M1)2	1D	2,4C4
EDEFAV	Cu(II)	5	square pyramid				B2, M1	M1		A*B2*M1)3	1D	2C1
EDOXUQ	Cu(II)	6	octahedron				B2	M1		A*B2)2*M1)2	1D	2,4C4
EDOYAX	Mn(II)	6	octahedron				M1	M1		A*M1)6	0D	0D
EFARAE	Cu(II)	5	square pyramid				B2, M1	B01		A*B2*B01*M1	1D	2C1
EFEKOQ	Mn(II)	6	octahedron				B2, B2			A*B2)3	2D	hxl
EFEKOQ01	Mn(II)	6	octahedron				B2, B2			A*B2)3	2D	hxl
EFEKOQ02	Mn(II)	6	octahedron				B2, B2			A*B2)3	2D	hxl
EFEKOQ03	Mn(II)	6	octahedron				B2, B2			A*B2)3	2D	hxl
EFEKOQ04	Mn(II)	6	octahedron				B2, B2			A*B2)3	2D	hxl
EFOSEY	Ni(II)	6	octahedron				M1	M1	M1	A*M1)6	0D	0D
EFOSIC	Zn(II)	6	octahedron				M1	M1	M1	A*M1)6	0D	0D
EFOSIC01	Zn(II)	6	octahedron				M1	M1	M1	A*M1)6	0D	0D
EFUWOR	Mn(II)	6	octahedron	Cu(II)	6	octahedron	B2, B2	B01		A*B2)2*B01	2D	sql
EFUWUX	Mn(II)	6	octahedron	Cu(II)	6	octahedron	B2, B2	B01		A*B2)2*B01	3D	dia	Class Ia Z=3
EGAVEO	Fe(II)	6, 6, 6, 6, 6, 6	octahedron				M1, M1, 0, 0	B2	M3	A)6*B2)13*M3)2*M1)4	0D	0D
EGAVIS	Fe(II)	6, 6, 6	octahedron				B2	B2	M3, M1	A)3*B2)7*M3*M1	1D	2C1
EGOFEM	Cu(II)	5	square pyramid				B2	B01	M1	A*B2*B01*M1	0D	1M2-1
EHAFUO	Mn(II)	6	octahedron				B2	M1		A*B2)2*M1)2	1D	2,4C4
EHAZUJ	Cu(II)	5	square pyramid				B2	T001		A*T001*B2	1D	2C1
EHIPAM	Mn(II)	6	octahedron				M1	B01		A*B01)2*M1)2	0D	0D
EHIPEQ	Co(II)	6	octahedron				M1	B01		A*B01)2*M1)2	0D	0D
EJIQIX	Cu(II)	5	square pyramid				B2, M1	B01		A*B2*B01*M1	1D	2C1
EKEDOO	Ni(II)	6, 6	octahedron				B2	T101	B2	A*T101*B2	1D	2C1
EKEGEG	Zn(II)	6	octahedron				M1	B01		A*B2)2*M1)2	1D	2,4C4
EKIGIP	Cu(II)	5, 5	square pyramid				M1	K0001		A*K0001*M1	0D	0D
EMINEU	Cd(II)	6	octahedron				B2	M1		A*B2)2*M1)2	2D	sql
EQEDEK	Cu(II)	5	square pyramid				B2, M1	B01		A*B2*B01*M1	1D	2C1
EQIVEF	Mn(II)	6	octahedron				B2, B2	B01		A*B2)2*B01	2D	sql
EQIYIN	Zn(II)	5, 5	square pyramid				B2, B2	K0101		A)2*K0101*B2)2	2D	hcb
ERETUR	Cu(II)	6	octahedron				0	M2	M1	A*M2*M1)4	1D	2C1
ESIZEN	Mn(III)	6	octahedron				M1	K0001		A*K0001*M1)2	0D	0D
ESOHUP	Cu(II)	4	tetrahedron				B2	B2		A*B2)2	2D	hcb
ESOXER	Co(II)	6	octahedron				B2, M1	T001		A*T001*B2*M1	1D	2C1
ESOXIV	Cu(II)	5	trigonal bipyramid				M1	T001		A*T001*M1)2	0D	0D
ESOYEQ	Ni(II)	6	octahedron				M1	K0001		A*K0001*M1)2	0D	0D
ESUYAT	Fe(II)	6	octahedron				M1	B01		A*B01)2*M1)2	0D	0D
ETOFAV	Cd(II)	6	octahedron				M1	M1	M1	A*M1)6	0D	0D
EVINED	Fe(II)	6	octahedron				M1	B2	M1	A*B2*M1)4	1D	2C1
EWEXUB	Ag(I)	2	linear				B2			A*B2	1D	2C1
EWONIN	Cd(II)	6	octahedron				M1	M1	M1	A*M1)6	0D	0D
EXENOK	Mn(II)	6, 6	octahedron	Cu(II)	4, 4	square	0, 0			A)3*G0101)3+A*M1)6	0D	0D
EXOJAC	Cu(II)	6	octahedron				B2, 0	B2		A*B2)3	3D	pcu
EXOJOQ	Mn(III)	6	octahedron				B2	K0001		A*K0001*B2	1D	2C1
EXOJUW	Fe(III)	6	octahedron				B2	K0001		A*K0001*B2	1D	2C1
EXOKAD	Mn(III)	6	octahedron				B2	K0001		A*K0001*B2	1D	2C1
EXOKEH	Fe(III)	6	octahedron				B2	K0001		A*K0001*B2	1D	2C1
EXOYOF	Cu(II)	5	square pyramid				B2	G002		A)2*G002*B2)2	1D	2,2,3C4
EZURAS	Fe(III)	6	octahedron				B2	B2		A*B2)3	2D	sql
FAKLEJ	Cu(II)	4, 4	square				0, 0			A*K0001	0D	0D
FAKLIN	Gd(III)	9		Cu(II)	5		B2, B2	G0002	B01	A)2*G0002*B01*B2)2	1D	2,4C4
FALRIV	Zn(II)	6	octahedron				B2, 0	B2		A*B2)3	3D	pcu
FALRIV01	Zn(II)	6	octahedron				B2, 0	B2		A*B2)3	3D	pcu
FALROB	Zn(II)	6	octahedron				B2, 0	B2		A*B2)3	3D	pcu
FALSAO	Co(II)	6	octahedron				B2, 0	B2		A*B2)3	3D	pcu
FAPJIQ	Mn(III)	6	octahedron				B2	K0001		A*K0001*B2	1D	2C1
FASZUW	Zn(II)	6	octahedron				B2	M1		A*B2)2*M1)2	1D	2,4C4
FAYVOR	Zn(II)	6	octahedron				B2, M1	B01		A*B2*B01*M1	1D	2C1
FAYVUX	Cu(II)	5	square pyramid				B2, M1	M1		A*B2*M1)3	1D	2C1
FEJYAV	Mn(II)	6	octahedron				B2	B2		A*B2)3	2D	sql
FEJYEZ	Mn(II)	6	octahedron				B2	B2		A*B2)3	2D	cds
FEKBED	Cd(II)	6	octahedron	Fe(III)	10		B2			A*B2)3	3D	pcu
FESLAS	Cu(II)	4	square	Ni(II)	6	octahedron	M1	K0101		A)3*K0101)2*M1)2	0D	0D
FEVXIP	Cu(II)	5, 5					B2, M1, M1	K02	M2	A)2*K02*B2*M2*M1)2	1D	2C1
FEZNUU	Eu(III)	9	tricapped trigonal prism				T3, T3			A*T3)3	3D	3,3,9T1
FEZPIK	Pr(III)	9	tricapped trigonal prism				T3, T3			A*T3)3	3D	3,3,9T1
FEZPEG	Nd(III)	9	tricapped trigonal prism				T3, T3			A*T3)3	3D	3,3,9T1
FEZPUW	La(III)	9	tricapped trigonal prism				T3, T3			A*T3)3	3D	3,3,9T1
FEZPAC	Sm(III)	9	tricapped trigonal prism				T3, T3			A*T3)3	3D	3,3,9T1
FEZPOQ	Ce(III)	9	tricapped trigonal prism				T3, T3			A*T3)3	3D	3,3,9T1
FIBHII	Ti(IV)	12, 12					M1	P00001	M2	A)2*P00001)4*M1)2*M2	0D	0D
FIBHOO	V(IV)	12					M1	P00001		A*P00001)2*M1)2	0D	0D
FIGMIT	Cd(II)	6	octahedron				B2	T11	M1	A*T11*B2*M1	3D	dia
FIGMOZ	Cd(II)	6	octahedron				B2	T11	M1	A*T11*B2*M1	3D	dia
FIGMUF	Cd(II)	7	MTP				B2	T11	B01	A*T11*B2*B01	2D	hcb
FIGTUM	Cd(II)	6, 6	octahedron				B2, M1	T11		A)2*T11)2*B2*M1)4	1D	2,2,3C6
FIJROG	Ni(II)	6	octahedron				B2, B2	B01		A*B2)2*B01	3D	dia
FIJRUM	Ni(II)	6, 6	octahedron				B2, B2, B2, B2	B01		A*B2)2*B01	2D	sql
FIJSOI	Cu(II)	5	square pyramid				B2	T001		A*T001*B2	1D	2C1
FIKMUJ	Cu(II)	5, 5, 5, 5	square pyramid				B2, B2, B2, B2	T001		A*T001*B2	1D	2C1
FIKNAQ	Cu(II)	5, 5, 5	square pyramid				B2, B2, B2	T001		A*T001*B2	1D	2C1
FILSIE	Mn(II)	6	octahedron				M1, M1	K0001		A*K0001*M1)2	0D	0D
FILSIE01	Mn(II)	6	octahedron				M1, M1	K0001		A*K0001*M1)2	0D	0D
FIMBEI	Re(II)	6	octahedron				M1	M1		A*M1)6	0D	0D
FIRPUU	Cu(II)	5	square pyramid				B2	T001		A*T001*B2	1D	2C1
FIWLII	Ag(I)	2	linear				0	M1		A*M1)2	0D	0D
FOMTEH	Cu(II)	6	octahedron				B2	M1		A*B2)2*M1)2	1D	2,4C4
FONKOJ	Cd(II)	6	octahedron				M1, M1	B01		A*B01)2*M1)2	0D	0D
FOYJEI	Cu(II)	4	tetrahedron				B2	M1		A*B2*M1)2	1D	2C1
FOYJOS	Ag(I)	4	tetrahedron				M1	M1		A*M1)4	0D	0D
FUHKUQ	Mn(III)	6	octahedron				B2	K0001		A*K0001*B2	1D	2C1
FUQKUY	Co(II)	6	octahedron				M1	M1		A*M1)6	0D	0D
FUVTOG	Co(II)	6	octahedron				B2	B01		A*B2)2*B01	2D	sql
FUVZEE	Cu(II)	2, 6	linear, octahedron				B2, B2, B2			A)2*B2)4	3D	pcu
FUVZEE01	Cu(II)	2, 6	linear, octahedron				B2, B2, B2			A)2*B2)4	3D	pcu
FUVZEE02	Cu(II)	2, 6	linear, octahedron				B2, B2, B2			A)2*B2)4	3D	pcu
FUVZUU	Cu(II)	6	octahedron				B2, B2			A*B2)3	2D	hxl
FUZBAE	Cu	5, 5, 5	trigonal bipyramid				B2	T001		A*T001*B2	1D	2C1
GAHWAP	Mn(II)	7	MTP				B2	P00001		A*P00001*B2	1D	2C1
GAMWOH	Mn(II)	6	octahedron				B2	M1		A*B2)2*M1)2	1D	2,4C4
GAMWUN	Mn(II)	6	octahedron				B2, M1	M1		A*B2*B01*M1	1D	2C1
GANBAZ	Mn(II)	6	octahedron				B2, B2, B2			A*B2)3	3D	pcu
GANBAZ01	Mn(II)	6	octahedron				B2, B2, B2			A*B2)3	3D	pcu
GANBAZ02	Mn(II)	6	octahedron				B2, B2, B2			A*B2)3	3D	pcu
GANBAZ03	Mn(II)	6	octahedron				B2, B2, B2			A*B2)3	3D	pcu
GANBAZ04	Mn(II)	6	octahedron				B2, B2, B2			A*B2)3	3D	pcu
GANBAZ06	Mn(II)	6	octahedron				B2, B2, B2			A*B2)3	3D	pcu
GANBED	Ni(II)	6	octahedron				B2, B2, B2, B2, B2, B2			A*B2)3	3D	pcu
GANBED01	Ni(II)	6	octahedron				B2, B2, B2, B2, B2, B2			A*B2)3	3D	pcu
GANBED02	Ni(II)	6	octahedron				B2, B2, B2, B2, B2, B2			A*B2)3	3D	pcu
GANBED03	Ni(II)	6	octahedron				B2, B2, B2, B2, B2, B2			A*B2)3	3D	pcu
GANBED04	Ni(II)	6	octahedron				B2, B2, B2, B2, B2, B2			A*B2)3	3D	pcu
GANBED05	Ni(II)	6	octahedron				B2, B2, B2, B2, B2, B2			A*B2)3	3D	pcu
GANBED06	Ni(II)	6	octahedron				B2, B2, B2, B2, B2, B2			A*B2)3	3D	pcu
GANBIH	Mn(II)	6, 6, 6, 6	octahedron				B2, B2, B2, B2			A*B2)3	3D	sqp
GANBON	Ni(II)	6, 6, 6, 6	octahedron				B2, B2, B2, B2			A*B2)3	3D	sqp
GANBUT	Mn(II)	6	octahedron				B2, B2			A*B2)3	3D	dia
GANCAA	Ni(II)	6	octahedron				B2, B2			A*B2)3	3D	dia
GEFBEZ	Mn(III)	6, 7	octahedron, MTP				M1	B21, B11	B01	A)2*B21*B11)2*B01*M1	0D	3,4M6-1
GEFBID	Mn(II), Mn(III)	6, 7	octahedron, MTP				B2	T201	B2, B11	A)2*T201*B2*B11)2	2D	3,4,5L39
GEFBOJ	Mn(II)	6, 6					B2	B11	M3, M1	A)2*B2*B11)2*M3*M1	2D	3,4,5L39
GEFBUP	Mn(II), Mn(III)	6, 6, 6, 6,	octahedron				B2	B21	B2, B11	A)2*B21*B2*B11)2	2D	3,4,5L39
GEFYEY	Ag(I)	4	tetrahedron				0			A*M1)4	0D	0D
GEFYIC	Ag(I)	4, 4	tetrahedron				B2, B2	T3, B3	B2	A)4*T3*B3*B2*M4)2	2D	bey
GELNOC	Cd(II)	6	octahedron				B2	M1		A*B2)2*M1)2	1D	2,4C4
GELYUT	Ni(II)	6	octahedron				M1	B01		A*B01)2*M1)2	0D	0D
GEMYUU	Zn(II)	4, 5	tetrahedron, square pyramid				B2, M1	K0101		A)2*K0101*B2*M1	0D	2M4-1
GEMZAB	Zn(II)	4, 5	tetrahedron, square pyramid				B2, M1	K0101		A)2*K0101*B2*M1	1D	2C1
GEMZEF	Zn(II)	5, 5, 6	square pyramid, octahedron				B2, B2	K0101		A)3*K0101)2*B2)2	1D	2,4C4
GEMZIJ	Zn(II)	5, 5	trigonal bipyramid				B2, M1	K0101		A)2*K0101*B2*M1	1D	2C1
GEWMAY	Fe(II)	6, 6	octahedron				B2, B2	K001		A*K0001*B2	1D	2C1
GEWMAY01	Fe(II)	6, 6	octahedron				B2, B2	K001		A*K0001*B2	1D	2C1
GEWMAY02	Fe(II)	6, 6	octahedron				B2, B2	K001		A*K0001*B2	1D	2C1
GEWMOM	Fe(II)	6, 6	octahedron				B2, B2	K001		A*K0001*B2	1D	2C1
GEWNAZ	Fe(II)	6, 6	octahedron				B2, B2	K001		A*K0001*B2	1D	2C1
GEWNAZ01	Fe(II)	6, 6	octahedron				B2, B2	K001		A*K0001*B2	1D	2C1
GEWNIH01	Fe(II)	6	octahedron				B2	K001		A*K0001*B2	1D	2C1
GEWNUT	Fe(II)	6, 6	octahedron				B2	K0001		A*K0001*B2	1D	2C1
GEWPAB	Fe(II)	6, 6	octahedron				B2	K0001		A*K0001*B2	1D	2C1
GIBGEF	Zn(II)	6	octahedron				M1, M1	B01		A*B01)2*M1)2	0D	0D
GIBRER	Cu(II)	5	trigonal bipyramid				B2	B11		A*B2*B11	1D	2,4C4
GIDQOZ	Mn(II)	6	octahedron				B2, B2	B2		A*B2)3	3D	pcu
GIDQOZ01	Mn(II)	6	octahedron				B2, B2	B2		A*B2)3	3D	pcu
GIDQOZ02	Mn(II)	6	octahedron				B2, B2	B2		A*B2)3	3D	pcu
GIDQOZ03	Mn(II)	6	octahedron				B2, B2	B2		A*B2)3	3D	pcu
GIDQOZ04	Mn(II)	6	octahedron				B2, B2	B2		A*B2)3	3D	pcu
GIFBOO	Ni(II)	6	octahedron				M1	B01		A*B01)2*M102	0D	0D
GIFJIP	Cd(II)	6	octahedron				B2	T3	M1	A*T3*B2*M1	1D	3,5C1
GIJWED	Mn(III)	6	octahedron				B2	K0001		A*K0001*B2	1D	2C1
GIJWED01	Mn(III)	6	octahedron				B2	K0001		A*K0001*B2	1D	2C1
GOJJEX	Cu(II)	5, 5, 5	square pyramid				B2	O0201	B01, M1	A)3*O0201*B2*B01)2*M1	1D	2C1
GORFEA	Cd(II)	7	OTP				B2	T001	B01	A*T001*B2*B01	1D	2C1
GORFIE	Cd(II)	6	octahedron				B2, 0	T001	M1	A*T001*B2*M1	1D	2C1
GORGEB	Cd(II)	7	OTP				B2	T001	B01	A*T001*B2*B01	1D	2C1
GOYPOB	Cu(II)	4	square				M1	T001		A*T001*M1	0D	0D
GUHNAB	Gd(III)	9	TTP	Cu(II)	5	square pyramid	B2, B2	G0002	B01	A)2*G0002*B2)2*B01	1D	2,4C4
GUHNEF	Ho(III)	9	TTP	Cu(II)	5	square pyramid	B2, B2	G0002	B01	A)2*G0002*B2)2*B01	1D	2,4C4
GUKPEI	Cu(II)	5	square pyramid				B2	T001		A*T001*B2	1D	2C1
GUVFEJ	Cd(II)	6	octahedron				B2	M1		A*B2)2*M1)2	2D	sql
GUVFIN	Cu(II)	6	octahedron				B2	M1		A*B2)2*M1)2	1D	2,4C4
GUYTAX	Cu(II)	5, 5	square pyramid				B2, B2	K0101		A)2*K0101*B2)2	1D	(4,4)(0,2)
HAMQIY	Cd(II)	6	octahedron				B2	B2		A*B2)3	3D	pcu
HAVCIR	Gd(III)	9	TTP				B2, M1, M1	B01	M1	A*B2*B01)2*M1)3	1D	2C1
HAXFIV	Zn(II)	4	tetrahedron				B2, B2			A*B2)2	2D	sql
HAXFIV01	Zn(II)	4	tetrahedron				B2, B2			A*B2)2	2D	sql
HAXFIV02	Zn(II)	4	tetrahedron				B2, B2			A*B2)2	2D	sql
HAXFIV03	Zn(II)	4	tetrahedron				B2, B2			A*B2)2	2D	sql
HAXHIY	Fe(II)	6	octahedron				M1	P00001		A*P00001*M1	0D	0D
HAXHOE	Fe(II)	6	octahedron				B2	P00001		A)2*P00001)2*B2	0D	1M2-1
HAXHUK	Fe(II)	6	octahedron				B2	P00001		A)2*P00001)2*B2	0D	1M2-1
HAXHUK01	Fe(II)	6	octahedron				B2	P00001		A)2*P00001)2*B2	0D	1M2-1
HAXHUK02	Fe(II)	6	octahedron				B2	P00001		A)2*P00001)2*B2	0D	1M2-1
HAXHUK03	Fe(II)	6	octahedron				B2	P00001		A)2*P00001)2*B2	0D	1M2-1
HAXHUK04	Fe(II)	6	octahedron				B2	P00001		A)2*P00001)2*B2	0D	1M2-1
HAXHUK05	Fe(II)	6	octahedron				B2	P00001		A)2*P00001)2*B2	0D	1M2-1
HAXHUK06	Fe(II)	6	octahedron				B2	P00001		A)2*P00001)2*B2	0D	1M2-1
HAYBUG	Ru(II)	8		Fe(II)	10		M1	G10001	P00001	A)2*G10001)2*P00001*M1	0D	1M2-1
HAYDAO	Mn(II)	6	octahedron				M1, M1	B01		A*B01)2*M1)2	0D	0D
HAYVIO	Ni(II)	6	octahedron				M1	M1		A*M1)6	0D	0D
HEBTUE	Co(II)	6	octahedron				M1	M1	M1	A*M1)6	0D	0D
HEBVEQ	Cu(II)	6	octahedron				B2	M1		A*B2)2*M1)2	1D	2,4C4
HECJIL	Co(II)	6	octahedron				B2	M1		A*B2)2*M1)2	1D	2,4C4
HECJOR	Cu(II)	6	octahedron				B2	M1		A*B2)2*M1)2	1D	2,4C4
HECJUX	Cu(II)	6	octahedron				B2	M1		A*B2)2*M1)2	1D	2,4C4
HEFCAX	Mn(II)	6	octahedron				B2	M1		A*B2)2*M1)2	1D	2,4C4
HEFCEB	Fe(II)	6	octahedron				B2	M1		A*B2)2*M1)2	1D	2,4C4
HEFCIF	Cu(II)	6	octahedron				B2	M1		A*B2)2*M1)2	1D	2,4C4
HEFCUR	Cu(II)	4	square				M1	B2		A*B2*M1)2	1D	2C1
HEFDEC	Co(II)	6, 6	octahedron				B2, B2	B2		A*B2)3	3D	pcu
HEWCOD	Cd(II)	6	octahedron				B2	B01	M2	A*B2*B01*M2	1D	2,4C4
HIDWUO	Cu(II)	5	square pyramid				M1	T11		A*T11*M1)2	1D	2C1
HIDXAV	Cu(II)	5	square pyramid				M1	T11	M1	A*T11*M1)2	0D	1M2-1
HIFMEP	Cu(I)	4	tetrahedron				B2, B2			A*B2)2	3D	dia
HIJKIW	Cd(II)	6	octahedron	Cu(II)	5	square pyramid	B2	K0101		A)3*K0101)2*B2)2	3D	qtz
HIJKOC	Cd(II)	6	octahedron	Cu(II)	4	square	B2	K0101		A)3*K0101)2*B2	1D	2C1
HONDUL	Cu(II)	5	square pyramid				B2, M1	B01		A*B2*B01*M1	1D	2C1
HOPTEM	Cu(II)	4	square				B2	T001		A)2*T001)2*B2	1D	2C1
HORSAL	Cu(II)	5	square pyramid				M1	T11	M1	A*T11*M1)2	1D	2C1
HORSEP	Cu(II)	5	square pyramid				B2, M1	B01		A*B2*B01*M1	1D	2C1
HOZXUR	Cu(II)	4	square				M1	T001		A*T001*M1	0D	0D
HUDKIC	Cu(II)	5	square pyramid				B2	T001		A*T001*B2	1D	2C1
HUTHIO	Ag(I)	4, 4	square				B2, B2	M2		A*B2*M2	1D	2,4C4
HUWKEP	Mn(II)	6	octahedron	Cu(II)	5	square pyramid	B2, M1	B01	M1	A)2*B2)2*B01)2*M1)3	1D	(4,4)(0,2)
HUWKIT	Mn(II)	6	octahedron	Zn(II)	6	octahedron	B2, M1	B01	M1	A)2*B2)2*B01)3*M1)2	1D	(4,4)(0,2)
HUYLAO	Mn(II)	6	octahedron				B2, B2	B01		A*B2)2*B01	3D	dia
IBOVEB	Ni(II)	6	octahedron				B2, B2	B01		A*B2)2*B01	2D	sql
IBOVEB01	Ni(II)	6	octahedron				B2, B2	B01		A*B2)2*B01	2D	sql
IBUVUW	Fe(II)	6	octahedron				M1	B01		A*B01)2*M1)2	0D	0D
IBUVUW02	Fe(II)	6, 6	octahedron				M1, M1	B01		A*B01)2*M1)2	0D	0D
IBUVUW03	Fe(II)	6, 6	octahedron				M1, M1	B01		A*B01)2*M1)2	0D	0D
IBUVUW04	Fe(II)	6, 6	octahedron				M1, M1	B01		A*B01)2*M1)2	0D	0D
IBUVUW05	Fe(II)	6, 6	octahedron				M1, M1	B01		A*B01)2*M1)2	0D	0D
IBUVUW06	Fe(II)	6, 6	octahedron				M1, M1	B01		A*B01)2*M1)2	0D	0D
IBUVUW07	Fe(II)	6, 6	octahedron				M1, M1	B01		A*B01)2*M1)2	0D	0D
IBUWEI	Cd(II)	6	octahedron				B2, B2	B2		A*B2)3	3D	sxa;Sqc34
ICOTOK	Cd(II)	6, 6	octahedron				B2, B2	B2		A*B2)3	2D	sql
IDORID	Mn(II)	6	octahedron				B2	M1		A*B2)2*M1)2	2D	sql
IFADOJ	Co(II)	6	octahedron				M1	M1	M1	A*M1)6	0D	0D
IGEGEH	Ni(II)	6, 6	octahedron				B2, M1	K0001		A)2*K0001)2*B2*M1)2	0D	1M2-1
IGEGIL	Ni(II)	6, 6	octahedron				B2, M1	K0001		A)2*K0001)2*B2*M1)2	0D	1M2-1
IGEGOR	Ni(II)	6, 6	octahedron				B2	K0001		A*K0001*B2	0D	2M3-1
IGEGUX	Ni(II)	6	octahedron				M1, M1	K0001		A*K0001*M1)2	0D	0D
IGEHAE	Ni(II)	6	octahedron				M1, M1	K0001		A*K0001*M1)2	0D	0D
IHAWAP	Cd(II)	6	octahedron				B2, B2	B01		A*B2)2*B01	2D	hcb
IHAWET	Cd(II)	6	octahedron				B2	B01		A*B2)2*B01	1D	2,4C1
IHIDAE	Cu(II)	6	octahedron				B2, B2	B01		A*B2)2*B01	2D	sql
IHIDEI	Cu(II)	6	octahedron				M1	B01		A*B01)2*M1)2	0D	0D
IHIDIM	Co(II)	6	octahedron				M1	B01		A*B01)2*M1)2	0D	0D
IHIDOS	Ni(II)	6	octahedron				M1	B01		A*B01)2*M1)2	0D	0D
IHOPAW	Cu(II)	6	octahedron				B2	M1		A*B2)2*M1)2	1D	2,4C4
IHOPEA	Cu(II)	6	octahedron				B2	B2	M1	A*B2)2*M1)2	2D	sql
IHOPIE	Cu(II)	6, 5	octahedron, square pyramid				B2	B2		A)3*B2)8	3D	yav
IJOQII	Cu(I)	4	tetrahedron				B2	B01		A*B2*B01	1D	2C1
ILAPUI	Co(II)	6	octahedron				M1	M1		A*M1)6	0D	0D
ILAQAP	Co(II)	6	octahedron				B2, B2	M1		A*B2)2*M1)2	2D	sql
ILAQET	Co(II)	6	octahedron				B2, B2	M1		A*B2)2*M1)2	2D	sql
ILEWUT	Cd(II)	7	OTP	Cu(II)	square pyramid		B2, M1	K0001	M1	A)2*G0002*B2*M1)2	1D	2C1
ILOWAI	Ni(II)	6	octahedron				B2, 0	B2		A*B2)3	3D	pcu
IMAFEI	Co(II)	6	octahedron				T3, B2	M1		A*T3*B2*M1	2D	sdd
IMAFIM	Fe(II)	6	octahedron				T3, B2	M1		A*T3*B2*M1	2D	sdd
IMAFOS	Mn(II)	6	octahedron				T3, B2	M1		A*T3*B2*M1	2D	sdd
IMIKIA	Co(II)	6	octahedron				M1, M1	B01		A*B01)2*M1)2	0D	0D
IMIKOG	Ni(II)	6	octahedron				M1, M1	B01		A*B01)2*M1)2	0D	0D
IMIKUM	Zn(II)	6	octahedron				M1, M1	B01		A*B01)2*M1)2	0D	0D
INIXIM	Cu(II)	5	square pyramid				M1	B01		A*B01)2*M1	0D	0D
INOHAV	Cd(II)	6	octahedron				B2	T3	M1	A*T3*B2*M1	3D	hms
IPAXAY	Co(II)	6	octahedron				B2	B01		A*B2*B01)2	1D	2C1
IPEDUC	Mn(II)	6	octahedron				B2, B2	B01		A*B2)2*B01	2D	hcb
IPEDUC02	Mn(II)	6	octahedron				B2, B2	B01		A*B2)2*B01	2D	hcb
IPEPIC	Cu(II)	4	square				B2	B01		A*B2*B01	1D	2C1
IPOFAV	Cu(II)	5	square pyramid				B2	K0001		A)2*K0001)2*B2	0D	1M2-1
IPOFEZ	Cu(II)	5, 5	square pyramid				B2	K0001		A)2*K0001)2*B2	0D	1M2-1
IQINED	Cu(II)	5, 5	square pyramid	Ni(II)	6	octahedron	M1, M1	K0101		A)3*K0101)2*M1)4		1,2M3-1
IQUYAU	Cu(II)	5, 5	square pyramid				M1, M1, M1, 0, 0	G002		A)2*G002*M1)4	0D	1M2-1
IREBAJ	Cu(II)	6	octahedron				M1	B2	M1	A*B2*M1)4	1D	2C1
IREBUD	Cd(II)	6	octahedron				B2, B2	B2		A*B2)3	3D	pcu
ISITUZ	Cd(II)	6	octahedron				T3			A*T3)2	3D	rtl
ISITUZ01	Cd(II)	6	octahedron				T3			A*T3)2	3D	rtl
ISOZOH	Co(II)						B2	B2		A*B2)3	3D	pcu
ISUVIB	Ni(II)	6	octahedron				B2, M1	T001		A*T001*B2*M1	0D	1M2-1
ISUVIB01	Ni(II)	6	octahedron				B2, M1	T001		A*T001*B2*M1	0D	1M2-1
ISUVOH	Ni(II)	6	octahedron				B2, M1	T001		A*T001*B2*M1	0D	1M2-1
ISUVUN	Ni(II)	6	octahedron				M1	T001	B2, M1	A)2*T001)2*B2*M1)4	0D	1M2-1
IVIGOK	Cu(II)	5	square pyramid				M1	G002		A)2*G002*M1)4	0D	1M2-1
IVUTUP	Ni(II)	4	square	Cu(II)	6	octahedron	M1	G0101		A)3*G0101)2*M1)2	0D	1,2M3-1
IVUYIH	Ni(II)	6	octahedron				B2	K0001		A*K0001*B2	1D	2C1
IVUYON	Ni(II)	6, 4	octahedron, square				M1	K0001		A*K0001*M1)2+A*K0001	0D	0D
IWOHUX	Cu(II)	6	octahedron				M1	B02		A*B01)2*M1)2	0D	0D
IXOQOD	Zn(II)	4	tetrahedron				B2	M1		A*B2*M1)2	1D	2C1
IXOSIZ	Zn(II)	4	tetrahedron				M1	M1		A*M1)4	0D	0D
IXOSIZ01	Zn(II)	4	tetrahedron				M1	M1		A*M1)4	0D	0D
IYAGOE	Co(II)	6	octahedron				B2, B2	B01		A*B2)2*B01	3D	dia
IYAGUK	Ni(II)	6	octahedron				B2, B2	B01		A*B2)2*B01	3D	dia
IYIKAE	Cd(II)	6, 6	octahedron				B2, B2	B2		A*B2)3	2D	sql
IYUKUJ	Fe(II)	6, 6	octahedron				B2	K0001		A*K0001*B2	0D	2M4-1
IYULEU	Fe(II)	6, 6	octahedron				B2	K0001		A*K0001*B2	0D	2M4-1
IZAFOE	Cu(II)	5, 5	trigonal bipyramid				B2	T001	M1	A)2*T001)2*B2*M1)2	0D	1M2-1
IZIDAX	Cu(II)	5, 5	square pyramid				B2, B2	K0101		A)2*K0101*B2)2	2D	hcb
JADFAZ	Zn(II)	5, 4	square pyramid, tetrahedron				B2, M1	K0101		A)2*K0101*B2*M1	0D	1M2-1
JADFED	Zn(II)	5, 4	square pyramid, tetrahedron				B2, M1	K0101		A)2*K0101*B2*M1	0D	1M2-1
JADFIH	Zn(II)	5, 4	square pyramid, tetrahedron				B2, M1	K0101		A)2*K0101*B2*M1	0D	1M2-1
JAGXAR	Cu(II)	5	trigonal bipyramid				M1	B01		A*B01)2*M1	0D	0D
JAKBIJ	Mn(II)	6	octahedron				B2, B2, B2			A*B2)3	3D	pcu
JAKBOP	Mn(II)	6	octahedron				B2, B2, B2			A*B2)3	3D	pcu
JAKBUV	Mn(II)	6	octahedron				B2, B2, B2			A*B2)3	3D	pcu
JAMKIS	Ni(II)	6	octahedron				B2	K0001		A*K0001*B2	1D	2C1
JAMKIS01	Ni(II)	6	octahedron				B2	K0001		A*K0001*B2	1D	2C1
JAQSAW	Ni(II)	6	octahedron	Cu(II)	6	octahedron	B2, B2	K0001		A)2*K0001*B2)4	3D	pcu
JATVIM	Re(II)	6	octahedron				M1	B01	M1	A*B01*M1)4	0D	0D
JEJTIE	Co(II)	6	octahedron				B2, B2	B01		A*B2)2*B01	3D	dia
JEPVOS	Zn(II)	4	tetrahedron				M1	B01		A*B01*M1)2	0D	0D
JESDUG	Cu(II)	3	triangle				B2	M1		A*B2*M1	1D	2C1
JESDUG01	Cu(II)	3	triangle				B2	M1		A*B2*M1	1D	2C1
JESDUG04	Cu(II)	3	triangle				B2	M1		A*B2*M1	1D	2C1
JESDUG05	Cu(II)	3	triangle				B2	M1		A*B2*M1	1D	2C1
JESDUG06	Cu(II)	3	triangle				B2	M1		A*B2*M1	1D	2C1
JESDUG07	Cu(II)	3	triangle				B2	M1		A*B2*M1	1D	2C1
JESDUG08	Cu(II)	3	triangle				B2	M1		A*B2*M1	1D	2C1
JESDUG09	Cu(II)	3	triangle				B2	M1		A*B2*M1	1D	2C1
JESQOO	Cd(II)	6, 6	octahedron				B2, B2, B2, B2	B01		A*B2)2*B01	2D	hcb
JEYDIA	Ag(I)	2	linear				B2			A*B2	1D	2C1
JEYDIA01	Ag(I)	2	linear				B2			A*B2	1D	2C1
JEYDIA02	Ag(I)	2	linear				B2			A*B2	1D	2C1
JEYDIA03	Ag(I)	2	linear				B2			A*B2	1D	2C1
JEYDIA04	Ag(I)	2	linear				B2			A*B2	1D	2C1
JEYDIA05	Ag(I)	2	linear				B2			A*B2	1D	2C1
JIGTUR	Zn(II)	6, 6, 6, 5	octahedron, square pyramid				M1, 0	K111, K011, T101, T001	M3	A)4*K111*K011*T101*T001*M3*M1)2	0D	3M4-1
JIQCUK	Zn(II)	6	octahedron				B2, 0	B2		A*B2)3	3D	pcu
JISYEQ	Fe(II)	6, 6	octahedron				B2	B01		A*B2*B01)2	1D	2C1
JISYEQ01	Fe(II)	6, 6	octahedron				B2	B01		A*B2*B01)2	1D	2C1
JIZYIB	Cu(II)	6, 5	octahedron, square pyramid				B2, M1	B01		A)3*B2)2*B01)4*M1)4	0D	1,2M3-1
JONJED	Ni(II)	6, 6	octahedron				B2	T101		A*T101*B2	2D	hcb
KADMUZ	Mn(II), Mn(III)	6, 6	octahedron				M1, M1	B11		A)2*B11)3*M1)3	0D	1,2M4-1
KAFGUW	Co(II)	6	octahedron				B2, B2	M1		A*B2)2*M1)2	2D	sql
KAFJOR	Ni(II)	5, 5, 4	square pyramid, square				M1	T3		A)3*T3)4*M1)2	0D	3,4M7-1
KAFNIR	Cu(II)	6, 6	octahedron				T3, B2	M1		A*T3*B2*M1	2D	3,4,4L13
KAFNOX	Cu(II)	5	square pyramid				B2	M1		A*B2*M1)3	1D	2C1
KAFNUD	Zn(II)	6, 6	octahedron				B2, B2	M1		A*B2)2*M1)2	2D	sql
KAFNUD01	Zn(II)	6, 6	octahedron				B2, B2	M1		A*B2)2*M1)2	2D	sql
KAFPEP	Zn(II)	6	octahedron				B2, B2	M1		A*B2)2*M1)2	2D	sql
KAFPIT	Ni(II)	6	octahedron				B2, B2	M1		A*B2)2*M1)2	2D	sql
KAFVIZ	Mn(II)	6	octahedron				B2, B2, B2	B2		A*B2)3	3D	nov
KAFVOF	Co(II)	6	octahedron				B2, B2	M1		A*B2)2*M1)2	2D	sql
KAFVUL	Ni(II)	6	octahedron				B2, B2	M1		A*B2)2*M1)2	2D	sql
KAJYIF	Re(II)	5	square pyramid				M1	B2		A*B2)2*M1	0D	1M2-1
KAMNIX	Mn(II)	7	pentagonal bipyramid				B2, M1	K0001		A*K0001*B2*M1	0D	1M2-1
KAMNIX01	Mn(II)	7	pentagonal bipyramid				B2, M1	K0001		A*K0001*B2*M1	0D	1M2-1
KAPMOE	Cu(II)	6, 6	octahedron				B2	B2	M1	A*B2)2*M1)2	1D	(4,4)(0,2)
KARRUR	Mn(II)	6	octahedron				B2	M1		A*B2*M1)4	1D	2C1
KATHIX	Ni(II)	6	octahedron				B2	M1		A*B2)2*M1)2	1D	2,4C4
KAYJAW	Cu(II)	5	square pyramid				M1	T001	M1	A*T001*M1)2	0D	0D
KEFMAK	Cu(II)	5	square pyramid				B2	T001		A*T001*B2	1D	2C1
KEFMEO	Cu(II)	4, 4	square				B2	T001		A)2*T001)2*B2	0D	1M2-1
KEFMEO01	Cu(II)	4, 4	square				B2	T001		A)2*T001)2*B2	0D	1M2-1
KEMHEQ	Cu(II)	5, 5	square pyramid				B2, B2, M1, M1	B01		A*B2*B01*M1	1D	2C1
KEPMEY	Fe(II)	6	octahedron				B2, B2	B01		A*B2)2*B01	2D	hcb
KEPMIC	Co(II)	6	octahedron				B2, B2	B01		A*B2)2*B01	2D	hcb
KEPMOI	Ni(II)	6	octahedron				B2, B2	B01		A*B2)2*B01	2D	hcb
KEPMUO	Mn(II)	6	octahedron				B2, B2	B01		A*B2)2*B01	2D	hcb
KEPNAV	Fe(II)	6	octahedron				B2, B2	B01		A*B2)2*B01	2D	hcb
KEPNEZ	Co(II)	6	octahedron				B2, B2	B01		A*B2)2*B01	2D	hcb
KEPNID	Ni(II)	6	octahedron				B2, B2	B01		A*B2)2*B01	2D	hcb
KEPNOJ	Mn(II)	6	octahedron				B2, B2	B01		A*B2)2*B01	2D	hcb
KEPNUP	Fe(II)	6	octahedron				B2, B2	B01		A*B2)2*B01	2D	hcb
KEPPAX	Co(II)	6	octahedron				B2, B2	B01		A*B2)2*B01	2D	hcb
KEPPEB	Ni(II)	6	octahedron				B2, B2	B01		A*B2)2*B01	2D	hcb
KEPPEB01	Ni(II)	6	octahedron				B2, B2	B01		A*B2)2*B01	2D	hcb
KEQLOK	Fe(II)	6	octahedron				B2, B2			A*B2)3	3D	pcu
KEQLUQ	Fe(II)	6	octahedron				B2, B2, B2			A*B2)3	3D	pcu
KEQLUQ01	Fe(II)	6	octahedron				B2, B2			A*B2)3	3D	pcu
KEQMAX	Co(II)	6	octahedron				B2, B2			A*B2)3	3D	pcu
KEQMAX01	Co(II)	6	octahedron				B2, B2			A*B2)3	3D	pcu
KEQMAX02	Co(II)	6, 6	octahedron				B2, B2, B2, B2, B2, B2			A*B2)3	3D	pcu
KEQMAX03	Co(II)	6	octahedron				B2, B2, B2			A*B2)3	3D	pcu
KERVEK	Cu(II)	4	tetrahedron				M1	T001		A*T001*M1	0D	0D
KETPAC	Zn(II)	5	square pyramid				B2, M1	B01		A*B2*B01*M1	1D	2C1
KETPEG	Fe(II)	6, 6	trigonal prism	Zn(II)	6	octahedron	B2	B01		A*B2)3+A*B01)3	2D	hcb
KEXDIB	Cu(II)	4, 4	tetrahedron	W	4	tetrahedron	B2	B2		A*B2)2	2D	sql
KEXDUN	Cu(II)	4, 4, 4	tetrahedron	Mo	4	tetrahedron	B2	B2		A*B2)2	2D	sql
KEYWIW	Cu(II)	4	square				0	K0001		A*K0001	0D	0D
KIBCOO	Cu(II)	5, 5		Mn(II)	6	octahedron	B2	G0101		A)2*G0101)2*B2)2	2D	hcb
KIBTEV	Cd(II)	6	octahedron				M1	B01		A*B01)2*M1)2	0D	0D
KIVXUK	Cu(II)	5, 5, 5, 5	square pyramid				B2, B2, B2, B2	K0101		A)2*K0101*B2)2	2D	hcb
KIVYAR	Cu(II)	5, 5	square pyramid				B2	K1001	M2, M1	A)2*K1001*B2*M2*M1	1D	2C1
KOJBET	Cu(II)	5	square pyramid				B2	B01	M1	A*B2*B01*M1	1D	2C1
KOJLUR	Cu(II)	6	octahedron				B2	M1		A*B2)2*M1)2	1D	2,4C4
KOMGOJ	Cd(II)	6, 6	octahedron				M1	B2		A)3*B2)8*M1)2	3D	4,6T43
KUGXUH	Co(II)	6	octahedron				B2	K0001		A*K0001*B2	1D	2C1
KUHXIV	Co(II)	6	octahedron				B2	M1		A*B2)2*M1)2	1D	2,4C4
KURHIQ	Mn(II)	6, 6	octahedron				T3, T3, B2, B2, B2			A)2*T3)2*B2)3	3D	3,3,6,6T44
KURHOW	Mn(II)	6	octahedron				B2, M1			A*B2)2*M1)2	1D	2,4C4
KUYNUO	Cu(II)	5	square pyramid				0	B01	M1	A*B01)2*M1	0D	0D
LAFJUY	Fe(II)	6	octahedron				B2	B2		A*B2)3	3D	pcu
LALPIY	Ni(II)	6	octahedron				0, 0	M1		A*M1)6	0D	0D
LAPFUE	Cu(II)	6	octahedron				B2	M1		A*B2)2*M1)2	1D	2,4C4
LAPGEP	Cu(II)	5	square pyramid				B2, M1	B01		A*B2*B01*M1	1D	2C1
LARPIG	Ni(II)	6	octahedron				0	K0001		A*K0001	0D	0D
LASDAM	Cu(II)	5	square pyramid				B2	T001		A*T001*B2	1D	2C1
LAVWUB	Co(II)	6	octahedron				B2	M1		A*B2)2*M1)2	1D	2,4C4
LAXSIO	Co(II)	6	octahedron				B2	K0001		A*K0001*B2	1D	2C1
LAYNIJ	Co(II)	6, 6	octahedron				B2	B2		A*B2)3	2D	sql
LEBGAB	Cu(II)	6	octahedron				M1	B01		A*B01)2*M1)2	0D	0D
LEBGEF	Cu(II)	5	square pyramid				0	B01	M1	A*B01)2*M1	0D	0D
LEJGAK	Dy(III)	8, 8, 8, 8, 8, 8	DTP				M1	K12, T02, B01	M1	A)2*K12*T02*B01*M1	0D	1,2M3-1
LEKDOX	Cu(II)	5	square pyramid				B2	T001		A*T001*B2	1D	2C1
LERQAC	Co(II)	6	octahedron				B2	M1		A*B2)2*M1)2	1D	2,4C4
LEWGIE	Cu(II)	4	tetrahedron				M1	M1		A*M1)4	0D	0D
LIKPIG	Cu(II)	5	square pyramid				M1	B01		A*B01)2*M1	0D	0D
LIMVOS	Cu(II)	6	octahedron				M1	B01		A*B01)2*M1)2	0D	0D
LIYXEW	Mn(II)	6	octahedron				M1	B01		A*B01)2*M1)2	0D	0D
LIYXIA	Zn(II)	6	octahedron				M1	B01		A*B01)2*M1)2	0D	0D
LODJIZ	Zn(II)	4	tetrahedron	Cu(II)	4	square	M1	K1001		A)3*K1001)2*M1)2	0D	2M3-1
LODJOF	Zn(II)	6	octahedron	Cu(II)	5	square pyramid	B2, B2	K0101		A)3*K0101)2*B2)2	2D	sql
LODJUL	Zn(II)	6	octahedron	Cu(II)	6	octahedron	B2	P01001		A)3*P01001)2*B2)2	3D	qtz
LOLMIJ	V(IV)	12					M1, M1	P00001		A*P00001)2*M1)2	0D	0D
LORYOH	Ni(II)	4	square				0	K0001		A*K0001	0D	0D
LOTQEQ	Cu(I)	4	tetrahedron				T3	M1		A*T3*M1	2D	hcb
LOTQIU	Cu(I)	3	triangle				B2, B2	B2		A)2*B2)3	2D	hcb
LOTQOA	Cu(I)	4, 4					B2	B2	M1	A)2*B2)3*M1)2	1D	(4,4)(0,2)
LOTQUG	Cu(I)	4, 4	tetrahedron				B2	B2	M1	A)4*B2)7*M1)2	2D	3,4L88
LOTRER	Cu(I)	4, 4, 4, 4, 4, 4	tetrahedron				B2	B2		A*B2)2	3D	dia	Class Ia Z=5
LOTRER01	Cu(I)	4, 4, 4, 4, 4, 4	tetrahedron				B2	B2		A*B2)2	3D	dia
LOZDOV	Zn(II)	5, 5					M1, M1	K011	B11	A)2*K011*B11*M1)2	0D	1M2-1
LUZHET	Co(II)	6	octahedron				M1	M1	M1	A*M1)6	0D	0D
LUZHET01	Co(II)	6	octahedron				M1	M1	M1	A*M1)6	0D	0D
LUZHIX	Cu(II)	5	trigonal bipyramid				B2	M1		A*B2*M1)3	1D	2C1
MAGTEU	Mn(II)	6	octahedron				M1	B2		A*B2)2*M1)2	2D	sql
MAJKAK	Cu(II)	5	square pyramid				M1	B01		A*B01)2*M1	0D	0D
MAKRIA	Co(II)	6, 6	octahedron				B2, B2	B2		A*B2)3	3D	pcu
MAKROG	Co(II)	6, 6	octahedron				B2, B2, B2	M2, M1		A)3*B2)6*M2)2*M1)2	3D	tck-4,5-Cccm-1
MAKRUM	Co(II)	6	octahedron				B2	M1		A*B2)2*M1)2	2D	sql
MARFEQ	Mn(II)	6	octahedron				B2	M1		A*B2)2*M1)2	1D	2,4C4
MASXEJ	Cu(II)	5	square pyramid				B2, M1	B01		A*B2*B01*M1	1D	2C1
MASXEJ01	Cu(II)	5	square pyramid				B2, M1	B01		A*B2*B01*M1	1D	2C1
MATXEK	Mn(II)	7	OTP				B2	T001	B01	A*T001*B2*B01	1D	2C1
MATXIO	Mn(II)	6	octahedron				B2, 0	T001	M1	A*T001*B2*M1	1D	2C1
MAZTOX	Cd(II)	6	octahedron				B2	B2		A*B2)3	2D	sql
MEBFAA	Cu(II)	6, 6, 6, 6, 6, 6, 6, 6	octahedron				B2, B2, B2, B2, B2, B2, B2, B2	B2		A*B2)3	3D	pcu
MECRUI	Gd(III)	6	octahedron				B2, M1, M1	M1		A*B2*M1)4	0D	1M2-1
MEKLUJ	Co(II)	6	octahedron				T3, B2	M1		A*T3*B2*M1	1D	New topology
MEKLUJ01	Co(II)	6	octahedron				T3, B2	M1		A*T3*B2*M1	1D	New topology
MEKMAQ	Ni(II)	6	octahedron				T3, B2	M1		A*T3*B2*M1	1D	New topology
MEKPIC	Cu(II)	5, 5	square pyramid				B2, M1	T02	B01, M1	A)2*T02*B2)2*M1)2	0D	2M4-1
MEKPOI	Cu(II)	5, 5	square pyramid				B2, B2	T02	B2	A)2*T02*B2)3	1D	(4,4)(0,2)
MELZEJ	Cu(II)	5	square pyramid				M1	K0001		A*K0001*M1	0D	0D
MEMBAI	Cd(II)	6	octahedron				B2, B2	B2		A*B2)3	2D	sql
MEMBAI01	Cd(II)	6	octahedron				B2, B2	B2		A*B2)3	2D	sql
METKIG	Mn(II)	6	octahedron				B2, B2	B01		A*B2)2*B01	1D	(4,4)(0,2)
MEYVIV	Cu(II)	6	octahedron				M1	M1	M1	A*M1)6	0D	0D
MEYVUH	Cu(II)	6	octahedron				B2	M1		A*B2)2*M1)2	2D	sql
MIFQIC	Co(II)	6	octahedron				B2	M1		A*B2)2*M1)2	2D	sql
MIGHEQ	Co(II)	6	octahedron				B2	B01		A*B2*B01)2	1D	2C1
MIRFID	Mn(II)	6	octahedron				M1	M1		A*M1)6	0D	0D
MISXAP	Ni(II)	6, 6	octahedron				B2	P002	B2	A)2*P002*B2)3	1D	2C1
MIWPUE	Cu(II)	5	trigonal bipyramid				B2	T001		A*T001*B2	1D	2C1
MIZPAM	Cd(II)	6	octahedron				B2	M1		A*B2)2*M1)2	1D	2,4C4
MODGOD	Cu(II)	5	square pyramid				B2, M1	B01		A*B2*B01*M1	1D	2C1
MOFXIO	Ni(II)	6	octahedron				M1	K0001		A*K0001*M1)2	0D	0D
MOFXOU	Ni(II)	6	octahedron				M1	K0001		A*K0001*M1)2	0D	0D
MOHZAM	Cu(II)	6	octahedron				B2, B2	B21		A*B21*B2	1D	3,5C22
MOHZAM01	Cu(II)	6	octahedron				B2, B2	B21		A*B21*B2	1D	3,5C22
MOKBIX01	Zn(II)	6, 6	octahedron				M1	B11	B2	A)3*B11)2*B2)5*M1)2	1D	3,4C26
MOSDUT	Co(II)	6, 6, 6	octahedron				B2, B2, B2, B2	G03	M1	A)3*G03*B2)4*M1)4	3D	moc
MOSJEM	Mn(II)	6	octahedron	Cu(II)	4	square	B2, B2	K0101		A)2*K0101*B2)2	1D	2,4C4
MOTXIC	Cu(II)	5	square pyramid				B2	B01	M1	A*B2*B01*M1	1D	2C1
MOTXUO	Cu(II)	6	octahedron				B2	B2		A*B2)3	1D	2,4C4
MSNGYD	Sn(IV)	6	octahedron				B2	M1		A*B2)2*M1)2	2D	sql
MSNGYT	Sn(IV)	5	trigonal bipyramid				B2	M1		A*B2*M1)3	1D	2C1
MTLCYA	Tl(I)						T4	M1		A*T4*M1)2	3D	pts
MUCYUG	Fe(II)	6, 6	octahedron				M1, M1, M1, M1	T001		A*T001*M1)3	0D	0D
MUHJEE	Fe(II)	6, 6	octahedron				B2, B2, B2, B2	B2		A*B2)3	3D	pcu
MUHJEE01	Fe(II)	6, 6	octahedron				B2, B2, B2, B2	B2		A*B2)3	3D	pcu
MUHKEF	Co(II)	6	octahedron				B2	B2		A*B2)3	2D	sql
MUHKIJ	Cu(II)	5	square pyramid				B2, M1	B2		A*B2)2*M1	2D	sql
MUHKOP	Cu(II)	5	square pyramid				B2, M1	B2		A*B2)2*M1	2D	sql
MUHKUV	Cu(II)	5	square pyramid				B2, M1	B2		A*B2)2*M1	2D	sql
MUHLAC	Fe(II)	6	octahedron				B1	M1		A*B2*M1)4	1D	2C1
MULWUL	Co(II)	6	octahedron				M1	B01		A*B01)2*M1)2	0D	0D
MULXAS	Co(II)	6	octahedron				B2	B01		A*B2*B01)2	1D	2C1
MULYAT	Mn(III)	6	octahedron				B2	K0001		A*K0001*B2	1D	2C1
MULYAT01	Mn(III)	6	octahedron				B2	K0001		A*K0001*B2	1D	2C1
MULYEX	Fe(III)	6	octahedron				B2	K0001		A*K0001*B2	1D	2C1
MULYEX01	Fe(III)	6	octahedron				B2	K0001		A*K0001*B2	1D	2C1
MUSNAQ	Ni(II)	6	octahedron				B2, B2	B01		A*B2)2*B01	2D	hcb
MUSNIY	Ni(II)	6	octahedron				B2	B01		A*B2*B01)2	1D	2C1
MUSNOE	Ni(II)	6	octahedron				M1	B01		A*B01)2*M1)2	0D	0D
MUXLUP	Cu(II)	5	trigonal bipyramid				M1	K0001		A*K0001*M1	0D	0D
MUXMEA	Cu(II)	5, 5, 5	trigonal bipyramid				M1, M1, M1	K0001		A*K0001*M1	0D	0D
NAFTOE	Cu(II)	5	square pyramid				M1	K0001		A*K0001*M1	0D	0D
NASVEK	Fe(II)	6	octahedron				M1	B01		A*B01)2*M1)2	0D	0D
NAVGEX	Ni(II)	6	octahedron				0	T001		A*T001)2	0D	0D
NAZSIS	Cu(II)	5	trigonal bipyramid				B2	T001		A*T001*B2	1D	2C1
NEBWAV	Zn(II)	6	octahedron				M1	B01		A*B01)2*M1)2	0D	0D
NEBWEZ	Cd(II)	6	octahedron				M1	B01		A*B01)2*M1)2	0D	0D
NEHYEE	Co(II)	6, 6	octahedron				B2, B2, B2	B2		A*B2)3	2D	sql
NEHYII	Ni(II)	6, 6	octahedron				B2, B2, B2	B2		A*B2)3	2D	sql
NEHYOO	Co(II)	6	octahedron				B2, B2, M1	M1		A)2*B2)5*M1)2	1D	(4,4)(0,2)
NEHYUU	Ni(II)	6	octahedron				B2, B2, M1	M1		A)2*B2)5*M1)2	1D	(4,4)(0,2)
NEJYAE	Mn(II)	6	octahedron				B2	B01		A*B2)2*B01	1D	2,4C4
NEJYEI	Co(II)	6	octahedron				B2	B01		A*B2)2*B01	2D	sql
NEKDOZ	Co(II)	6	octahedron				B2, B2	B01		A*B2)2*B01	2D	sql
NELMIA	Cu(II)	4	square				M1	M1		A*M1)4	0D	0D
NELMIA01	Cu(II)	4	square				M1	M1		A*M1)4	0D	0D
NEPLAW	Mn(II)	6	octahedron				M1	M1		A*M1)6	0D	0D
NEPLEA	Co(II)	6	octahedron				B2, 0	B2		A*B2)3	2D	sql
NERRUY	Cu(II)	6	octahedron				M1	B01		A*B01)2*M1)2	0D	0D
NETJED	Fe(II)	6	octahedron				M1	B01		A*B01)2*M1)2	0D	0D
NETJED01	Fe(II)	6	octahedron				M1	B01		A*B01)2*M1)2	0D	0D
NETSIQ	Mn(III)	6	octahedron				B2	K0001		A*K0001*B2	1D	2C1
NEWCUP	Cd(II)	6	octahedron				B2, M1	B2	M1	A*B2)2*M1)2	2D	sql
NEXNOU	Mn(II)	6	octahedron	Cr(III)	6	octahedron	M1	B2, B01	M1	A)2*B2*B01)2*M1)6	0D	1M2-1
NEXNUA	Mn(II)	6	octahedron	Cr(III)	6	octahedron	M1	B2, B01	M1	A)2*B2)3*B01*M1)4	1D	(4,4)(0,2)
NEXPAI	Mn(II)	6, 6	octahedron	Cr(III)	6, 6	octahedron	B2	B2	B01	A)4*B2)8*B01)3*M1)2	3D	3,3,4,6T6
NEZXIA	Mn(II)	6	octahedron				M1	B2		A*B2)2*M1)2	1D	2,4C4
NEZXOG	Fe(II)	6	octahedron				M1	B2		A*B2)2*M1)2	1D	2,4C4
NEZXUM	Co(II)	6	octahedron				M1	B2		A*B2)2*M1)2	1D	2,4C4
NEZYAT	Cu(II)	6, 6	octahedron				M1, M1	K12	B2, M1	A)3*K12)2*B2)2*M1)4	1D	2C1
NEZYEX	Zn(II)	6	octahedron				M1	B2		A*B2)2*M1)2	1D	2,4C4
NEZYIB	Cd(II)	6	octahedron				M1	B2		A*B2)2*M1)2	1D	2,4C4
NEZZID	Ni(II)	4	square				0	K0001		A*K0001	0D	0D
NEZZOJ	Ni(II)	4	square				0	K0001		A*K0001	0D	0D
NIHKOH	Fe(II)	6	octahedron				B2	B01		A*B2)2*B01	1D	2,4C4
NIJZIQ	Cd(II)	6	octahedron				M1	B2		A*B2)2*M1)2	1D	2,4C4
NORSUJ	Cu(II)	4	square				0	K0001		A*K0001	0D	0D
NOTRUL	Cd(II)	6	octahedron				B2, B2, B2			A*B2)3	3D	pcu
NUBBIY	Mn(II)	6	octahedron				B2	M1		A*B2)2*M1)2	2D	sql
NUJWAS	Mn(II)	6	octahedron				B2	M1		A*B2)2*M1)2	1D	2,4C4
NUJWEW	Co(II)	6	octahedron				B2	M1		A*B2)2*M1)2	2D	sql
NUJWIA	Cd(II)	6	octahedron				B2	M1		A*B2)2*M1)2	1D	2,4C4
NUKDON	Cu(II)	5	trigonal bipyramid				B2	T001		A*T001*B2	1D	2C1
NUKDUT	Cu(II)	5	square pyramide				B2	K0001		A)2*K0001)2*B2	0D	1M2-1
NUTBUC	Cu(II)	5	trigonal bipyramid				B2, M1	B01		A*B2*B01*M1	1D	2C1
NUTCAJ	Cu(II)	5, 6	square pyramid, octahedron				B2, B2, B2	B01		A)3*B2)6*B01)2	1D	(4,4)(0,2)
NUTNAU	Cu(II)	5	square pyramid				M1	K101		A*K101*M1	0D	1M2-1
OBEWOI	Cu(II)	5, 5	trigonal bipyramid				B2, M1	B01		A*B2*B01*M1	0D	1M2-1
OBEWUO	Cu(II)	5	trigonal bipyramid				B2	B01	M1	A*B2*B01*M1	1D	2C1
OBEXAV	Cu(II)	5, 5	square pyramid				M1, M1, M1, M1	B01		A*B01*M1)3	0D	0D
OBIXAA	Cu(I)	4	tetrahedron				B2	M1		A*B2*M1)2	1D	2C1
OCIBEK	Zn(II)	6	octahedron				M1	K4		A*K4*M1)2	2D	sql
OCIPIC	Cu(II)	5	square pyramid				M1	T001	M1	A*T001*M1)2	0D	0D
OCIPOI	Cu(II)	4	square				M1	T001		A*T001*M1	0D	0D
ODANAJ	Cu(II)	5	square pyramid				0	B01	M1	A*B01)2*M1	0D	0D
OFABAY	Co(II)	6, 6	octahedron				T3, B2	M1		A*T3*B2*M1	2D	3,4,4L13
OFABEC	Ni(II)	6, 6	octahedron				T3, B2	M1		A*T3*B2*M1	2D	3,4,4L13
OHASIB	Mn(II)	5, 6	square pyramid, octahedron				B2	K1001, K0001		A)2*K1001*K0001*B2	0D	1,2M3-1
OHETOK	Mn(II)	7	OTP				B2	T001	B01	A*T001*B2*B01	1D	2C1
OHETOM	Cu(II)	5, 5	square pyramid				M1	B01	M3, M2	A)2*B01)2*M3*M2*M1	0D	2,3M4-1
OHETUQ	Mn(II)	6	octahedron				M1	T001	B2, M1	A)2*T001)2*B2*M1)4	0D	1M2-1
OHEVAY	Mn(II)	6	octahedrin				B2	M1		A*B2)2*M1)2	1D	2,4C4
OHUROY	Cu(II)	5, 5	trigonal bipyramid				B2	T001		A*T001*B2	0D	2M4-1
OKECEO	Co(II)	5	square pyramid				M1	K0001		A*K0001*M1	0D	0D
OKECIS	Mn(II)	5, 5	square pyramid				B2, B2	K0101		A)2*K0101*B2)2	2D	hcb
OLIWIP	Cu(II)	5	trigonal bipyramid				M1, M1	T001		A*T001*M1)2	0D	0D
OLIWIP01	Cu(II)	5	trigonal bipyramid				M1, M1	T001		A*T001*M1)2	0D	0D
OLIWIP02	Cu(II)	5	trigonal bipyramid				M1, M1	T001		A*T001*M1)2	0D	0D
OLIWOV	Cu(II)	5	square pyramid				M1, 0	K0001		A*K0001*M1	0D	0D
OLONAE	Cu(II)	6	octahedron				M1, M1	B01		A*B01)2*M1)2	0D	0D
OLOPIO	Cu(II)	5	square pyramid				B2, M1	B01		A*B2*B01*M1	1D	2C1
OLOPIO01	Cu(II)	5	square pyramid				B2, M1	B01		A*B2*B01*M1	1D	2C1
OLUMUD	Cu(II)	5	square pyramid				B2, M1	B01		A*B2*B01*M1	1D	2C1
OMUZIH	Cu(II)	4	square				0	B01		A*B01)2	0D	0D
ONEWAI	Zn(II)	4, 5	tetrahedron, square pyramid				B2, M1	K0101		A)2*K0101*B2*M1	0D	2M4-1
ONEWEM	Zn(II)	4, 5	tetrahedron, square pyramid				B2, M1	K0101		A)2*K0101*B2*M1	0D	2M4-1
ONIJOL	Cu(II)	5	square pyramid				B2, M1	K02		A)2*K02*B2)2*M1)2	1D	(4,4)(0,2)
ONIJUR	Ni(II)	6	octahedron				B2	K0001		A*K0001*B2	1D	2C1
ONOXEX	Mn(II)	6	octahedron	Ni(II)	6	octahedron	M1	P0011	M1	A)3*P0011)2*M1)4	0D	1M2-1
OPIYIX	Cu(II)	5	trigonal bipyramid				B2	T001		A*T001*B2	1D	2C1
OPIYOD	Cu(II)	5	trigonal bipyramid				B2	T001		A*T001*B2	1D	2C1
OPIYUJ	Cu(II)	5	trigonal bipyramid				B2	T001		A*T001*B2	1D	2C1
OQIMEI	Co(II)	6	octahedron				B2	M1		A*B2)2*M1)2	2D	sql
OQIMIM	Ni(II)	6	octahedron				B2	M1		A*B2)2*M1)2	2D	sql
OQIMOS	Cd(II)	6	octahedron				B2	M1		A*B2)2*M1)2	2D	sql
OQIMUY	Zn(II)	5	trigonal bipyramid				B2, M1	B2		A*B2)2*M1	2D	sql
OQIPAH	Ni(II)	6	octahedron				B2	B01		A*B2)2*B01	2D	sql
OQIPEL	Zn(II)	5	trigonal bipyramid				B2, M1	B01		A*B2*B01*M1	1D	2C1
ORITOA	Mn(II)	6	octahedron				M1	T001	M1	A*T001*M1)3	0D	0D
OSANIG	Fe(II)	6, 6	octahedron	Ru	6	octahedron	B2	B01		A*B2)3+A*B01)3	2D	hcb
OSANOM	Mn(II)	6, 6	octahedron	Ru	6	octahedron	B2	B01		A*B2)3+A*B01)3	2D	hcb
OTUWOR	Cd(II)	6, 6	octahedron				B2	T11	M1	A)2*T11)2*B2*M1)4	2D	hcb
OVAVOY	Co(II)	6	octahedron				B2	M1		A*B2)2*M1)2	1D	2,4C4
OVIYAU	Mn(II)	6	octahedron				B2, B2	B01		A*B2)2*B01	3D	dia
OVIYEY	Co(II)	6	octahedron				B2, B2	B01		A*B2)2*B01	3D	dia
OVIYIC	Cu(II)	5					B2, B2	M1		A*B2)2*M1	3D	dia
OVIYOI	Zn(II)	6	octahedron				B2, B2	B01		A*B2)2*B01	3D	dia
OVUBEN	Cu(II)	5					M1	T101		A*T101*M1	0D	1M2-1
OZERIV	Fe(II)	6	octahedron				B2, B2, M1	M1		A*B2)2*M1)2	2D	sql
PADNUG	Cu(II)	5, 5					B2, M1	K0101	M1	A)2*K0101*B2*M1)2	0D	1,2M4-1
PALTOO	Cd(II)	6	octahedron				B2, B2	M1	M1	A*B2)2*M1)2	2D	sql
PASCAP	Cu(II)	3, 4	triangle, tetrahedron	W	6	TP	B2, B2	T001	M3	A)4*T001*B2)2*M3)3	2D	hcb
PAXWER	Mn(II)	6, 6	octahedron				T3, B2	M1		A*T3*B2*M1	2D	3,4,4L13
PAXWIV	Cu(II)	6, 6	octahedron				T3, B2	M1		A*T3*B2*M1	2D	3,4,4L13
PAYHUU	Ni(II)	6	octahedron				M1, M1	M1		A*M1)6	0D	0D
PEBMEQ	Cu(II)	6	octahedron				B2	M1		A*B2)2*M1)2	1D	2,4C4
PEBROF	Cu(II)	5	square pyramid				B2	T001		A*T001*B2	1D	2C1
PEBRUL	Cu(II)	6, 5	octahedron, square pyramid				B2, M1	T001		A)2*T001)2*B2*M1)3	0D	1M2-1
PEGZIM	Fe(II)	6	octahedron				M1, M1	M1		A*M1)6	0D	0D
PEGZOS	Mn(II)	6	octahedron				M1, M1	M1		A*M1)6	0D	0D
PELTEH	Cu(II)	4, 4, 5	square, square pyramid				M1, M1, M1	N003		A)3*N003*M1)4	0D	2M3-1
PEVCEZ	Cu(II)	4	square				B2			A*B2)2	1D	2,4C4
PEVCID	Cu(II)	6	octahedron				M1	B2		A*B2)2*M1)2	1D	2,4C4
PEVCOJ	Cd(II)	6	octahedron				B2	M1		A*B2)2*M1)2	1D	2,4C4
PEVCUP	Ni(II)	6	octahedron				M1	M1	M1	A*M1)6	0D	0D
PEVDAW	Cu(II)	6	octahedron				M1	M1	M1	A*M1)6	0D	0D
PEWXUL	Ni(II)	6	octahedron				B2	B2		A*B2)3	3D	pcu
PEWXUL01	Ni(II)	6	octahedron				B2	B2		A*B2)3	3D	pcu
PEXMUB	Mn(II)	6	octahedron				B2, B2	M1	M1	A*B2)2*M1)2	2D	hcb
PIGWIM	Cu(II)	5	trigonal bipyramid				M1	M2	B01	A*B01*M2*M1	0D	1M2-1
PIJZEO	Ni(II)	6, 6	octahedron				B2, B2	K0001		A*K0001*B2	1D	2C1
PIKTAF	Cu(II)	5, 5					B2, B2	B01		A*B2*B11	2D	hcb
PIVGIL	Ni(II)	6, 6	octahedron	Pr(III)	TTP		M1, M1	G0002	B2	A)6*G0002)4*B2*M1)8	0D
PIVJAG	Cu(II)	5	square pyramid				B2	T001		A*T001*B2	1D	2C1
PIVNAK	Cu(II)	5	square pyramid				B2	T001		A*T001*B2	1D	2C1
POCVUA	Pb(II)	6	octahedron				B2, M1	M1		A*B2*M1)4	0D	1M2-1
POGYIU	Cu(II)	5					M1	K0001		A*K0001*M1	0D	0D
POGYOA	Cu(II)	5					M1	K0001		A*K0001*M1	0D	0D
POGYUG	Cu(II)	5					M1	K0001		A*K0001*M1	0D	0D
POHQOT	Cd(II)	6, 5	octahedron, square pyramid				B2	B2	B01	A)4*B2)7*B01)4	2D	sql
POMSAM	Mn(II)	7	OTP				M1	T001	B01, M1	A*T001*B01*M1)2	0D	0D
POVGUF	Co(II)	6	octahedron				B2	B01		A*B2*B01)2	1D	2C1
POXLIY	Zn(II)	5, 5	square pyramid				B2, B2	K0101		A*K0101*B2)2	2D	hcb
POXLOE	Cu(II)	4	square	Cd(II)	6	octahedron	B2, B2	K0101		A*K0101*B2)2	2D	sql
PUDFOK	Cd(II)	6, 6	octahedron				B2, B2, B2	B01		A*B2)2*B01	2D	sql
PUDVEQ	Cd(II)	6	octahedron				B2, M1	B2	M1	A*B2)2*M1)2	2D	sql
PUDVIU	Cd(II)	6	octahedron				M1	B2	M1	A*B2)2*M1)2	2D	sql
PUKJIO	Cu(II)	6	octahedron				T3			A*T3)2	3D	rtl
PUKJIO01	Cu(II)	6	octahedron				T3			A*T3)2	3D	rtl
PUKJIO02	Cu(II)	6	octahedron				T3			A*T3)2	3D	rtl
PUNGIR	Zn(II)	4, 6	tetrahedron, octahedron				M1	K0101	B2	A)2*K0101*B2*M1)2	0D	1M2-1
PUPVAY	Cu(II)	5	square pyramid				M1	K0001		A*K0001*M1	0D	0D
PUPVEC	Zn(II)	5	square pyramid				M1	K0001		A*K0001*M1	0D	0D
PUPVIG	Cd(II)	5, 5, 5, 5	trigonal bipyramid				B2, B2	K0001		A)2*K0001)2*B2	0D	1M2-1
PUPXOO	Cd(II)	7	pentagonal bipyramid				B2	P00001		A*P00001*B2	1D	2C1
PUPXUU	Cd(II)	7	pentagonal bipyramid				B2	P00001		A*P00001*B2	1D	2C1
PURFEQ	Cu(II)	6	octahedron				B2	M1		A*B2)2*M1)2	2D	sql
PURFEQ01	Cu(II)	6	octahedron				B2	M1		A*B2)2*M1)2	2D	sql
PURFIU	Cu(II)	6	octahedron				B2	M1		A*B2)2*M1)2	1D	2,4C4
PURGAN	Cu(II)	6	octahedron				B2	M1		A*B2)2*M1)2	1D	2,4C4
PURGER	Cu(II)	6	octahedron				B2	M1		A*B2)2*M1)2	2D	sql
PURGIV	Cu(II)	6, 6	octahedron				B2, B2	M1		A*B2)2*M1)2	1D	2,4C4
PURGOB	Cu(II)	6	octahedron				B2	B2		A*B2)3	3D	rob
QAFNAO	Mn(II)	6	octahedron				B2	M1		A*B2)2*M1)2	1D	2,4C4
QAFNAO01	Mn(II)	6	octahedron				B2	M1		A*B2)2*M1)2	2D	sql
QAFNES	Co(II)	6	octahedron				B2	M1		A*B2)2*M1)2	1D	2,4C4
QAFSOI	Mn(II)	6, 6, 6	octahedron				B2, B2	K101		A*K101*B2	3D	pcu
QAFTEZ	Mn(II)	6, 6	octahedron				M1	K101	M1	A)3*K101)2*M1)4	1D	2C1
QAHTAW	Cu(II)	5	trigonal bipyramid				M1	T001	M1	A*T001*M1)2	0D	0D
QAKGUE	Mn(II)	6, 6	octahedron	Fe(II)	6	octahedron	B2	B01		A*B2)3+A*B01)3	2D	hcb
QAKHAL	Fe(II)	6, 6	octahedron	Fe(II)	6	octahedron	B2	B01		A*B2)3+A*B01)3	2D	hcb
QAKHEP	Mn(III)	6, 6	octahedron	Ni(II)	6	octahedron	B2	B01		A*B2)3+A*B01)3	2D	hcb
QAKWUV	Mn(II)	6	octahedron				B2	M1		A*B2)2*M1)2	1D	2,4C4
QAVDUP	Co(II)	6, 6	octahedron				B2, B2	K0001		A*K0001*B2	1D	2C1
QAWZEU	Cu(II)	5, 5	trigonal bipyramid				M1, M1	B01		A*B01)2*M1	0D	0D
QAWZIY	Cu(II)	5	trigonal bipyramid				M1	B01		A*B01)2*M1	0D	0D
QAZBIE	Ni(II)	6, 6	octahedron				M1	T101	B2	A)2*T101)2*B2*M1)2	0D	1M2-1
QEBJOW	Co(II)	6	octahedron				B2, B2	B2		A*B2)3	3D	pcu
QEBJOW01	Co(II)	6	octahedron				B2, B2	B2		A*B2)3	3D	pcu
QEBVUQ	Cu(II)	5, 5	square pyramid				B2, B2	T001		A*T001*B2	1D	2C1
QEFQEX	Co(II)	6	octahedron				B2, B2, B2	K02		A)2*K02*B2)4	2D	sql
QEFQEX01	Co(II)	6	octahedron				B2, B2, B2	K02		A)2*K02*B2)4	2D	sql
QEGJAN	Mn(II)	6	octahedron				B2, M1	B01		A*B2*B01*M1)2	1D	2C1
QEGPEZ	Cu(II)	4, 4, 4, 4, 5, 5					M1	T3, T02	M3	A)6*T3)2*T02)3*M1)2*M3)2	0D	New topology
QEHHIU	Fe(II)	6	octahedron				B2, M1	B01	M1	A*B2*B01*M1)2	1D	2C1
QEHLEU	Co(II)	6	octahedron				B2, M1	B01	M1	A*B2*B01*M1)2	1D	2C1
QEKTEG	Cu(II)	5	square pyramid				B2, B2	M1		A*B2)2*M1	2D	hcb
QERKOO	Ni(II)	6	octahedron				M1	B01		A*B01)2*M1)2	0D	0D
QERKOO01	Ni(II)	6	octahedron				M1	B01		A*B01)2*M1)2	0D	0D
QEYMOY	Ni(II)	6	octahedron				B2, B2	T001	M1	A*T001*B2*M1	1D	2C1
QEYYAW	Ni(II)	6	octahedron				M1	B01		A*B01)2*M1)2	0D	0D
QEZHIN	Fe(III)	7	pentagonal bipyramid				M1	T001	B2 B01	A)2*T001)2*B01)2*M2*M1)2	0D	1M2-1
QIHNAW	Co(II)	4, 5, 5	square, square pyramid				M1	T3		A)3*T3)4*M1)2	0D	1,2M3-1
QIJKOJ	Mn(II)	6	octahedron				B2, B2			A*B2)3	2D	sql
QIJKOJ01	Mn(II)	6	octahedron				B2, B2			A*B2)3	2D	sql
QIJKUP	Mn(II)	6	octahedron				B2, B2			A*B2)3	2D	sql
QIJLAW	Mn(II)	6, 6	octahedron				B2, B2, B2, B2, B2, B2			A*B2)3	3D	bnn
QIJPIK	Cu(II)	5	trigonal bipyramid				M1	B01		A*B01)2*M1	0D	0D
QIJSAD	Cu(II)	5	trigonal bipyramid				M1	B01		A*B01)2*M1	0D	0D
QIKJOL	Cu(II)	5		Gd(III)	8		B2	P021	B01	A)3*P021)2*B01)2*B2	1D	2C1
QIQWOC	Cu(II)	6	octahedron				B2	B2		A*B2)3	3D	pcu
QIVSAQ	Cu(II)	4, 5	square, square pyramid				B2	T11	B01	A)3*T11)2*B2)2*B01)2	1D	2,4C4
QIXSOG	Mn(II)	6	octahedron	Cu(II)	2	linear	B2			A*B2)2	3D	pcu
QIXSOG01	Mn(II)	6	octahedron	Cu(II)	2	linear	B2			A*B2)2	3D	pcu
QOCYOW	Ru(II), Ru(III)	6	octahedron				B2	B2		A)2*B2)5	1D	2C1
QOGLII	Cu(II)	5	square pyramid				B2, M1	B01		A*B2*B01*M1	1D	2C1
QOGLOO	Cu(II)	5	square pyramid				B2, M1, 0	B01		A*B2*B01*M1	0D	1M2-1
QOGTIQ	Cu(I)	3	triangle				B2	B2		A)2*B2)3	1D	(4,4)(0,2)
QOPTIY	Au(I)	2	linear				M1	M1		A*M1)2	0D	0D
QOSXUR	Co(II)	6	octahedron				B2, M1			A*B2)2*M1)2	1D	2,4C4
QOSXUR01	Co(II)	6	octahedron				B2, M1			A*B2)2*M1)2	1D	2,4C4
QOSYAY	Co(II)	6	octahedron				B2, B2			A*B2)3	2D	sql
QUFHEF	Mn(II)	6	octahedron				B2	M1		A*B2)2*M1)2	2D	sql
QUFHIJ	Co(II)	6	octahedron				B2	M1		A*B2)2*M1)2	2D	sql
QUFKUY	Cd(II)	6, 7	octahedron, pentagonal bipyramid				B2, M1	T02	B01, M1	A)3*T02)2*B2)2*B01)2*M1)4	2D	hcb
QUGSUJ	Cd(II)	6, 6	octahedron				B2, M1, M1	G0101		A)2*G0101*B2*M1)4	1D	2C1
QUJVEW	Mn(II)	6	octahedron				B2, B2	K02		A)2*K02*B2)4	3D	bnn
QUJVIA	Cu(II)	5	square pyramid				B2, M1	K02		A)2*K02*B2)2*M1)2	1D	(4,4)(0,2)
QUJVIA01	Cu(II)	5	square pyramid				B2, M1	K02		A)2*K02*B2)2*M1)2	1D	(4,4)(0,2)
QUMPUM	Rh(IV)	4	tetrahedron				M1	M1		A*M1)4	0D	0D
QUVHEX	Cu(II)	5	square pyramid	Sm(III)	9	TTP	B2, B2, B2	G0002	B2	A)2*G0002*B2)3	2D	hcb
QUVHIB	Cu(II)	5	square pyramid	Dy(III)	9	TTP	B2, B2, B2	G0002	B2	A)2*G0002*B2)3	2D	hcb
QUVHUN	Cu(II)	5	square pyramid	Dy(III)	9	TTP	B2, B2	G0002	B01	A)2*G0002*B2)2*B01	1D	2,4C4
QUVYEO	Co(II)	6	octahedron	Au(III)	4		B2	K21		A)2*K21)2*B2	2D	3,6L18
QUWGUM	Fe(II)	6	octahedron				M1	M1		A*M1)6	0D	0D
QUWHAT	Fe(II)	6	octahedron				B2	M1		A*B2)2*M1)2	1D	2,4C4
RACZAX	Cu(II)	4	tetrahedron				B2	B01		A*B2*B01	1D	2C1
RAQMOM	Mn(II)	6	octahedron	Cr(III)	6	octahedron	M1	B2, B01	M1	A)2*B2)2*B01)2*M1)4	1D	2C1
RATBAR	Cu(I)	5, 5	trigonal bipyramid				B2, B2	K0101		A)2*K0101*B2)2	2D	hcb
RATBEV	Cu(I)	6, 4	octahedron, square				M1	K0101		A)3*K0101)2*M1)2	0D	1,2M3-1
RAVHAA	Fe(II)	10					0	P00001		A*P00001)2	0D	0D
RAVHAA01	Fe(II)	10					0	P00001		A*P00001)2	0D	0D
RAWVUI	Cd(II)	6	octahedron				B2	M1		A*B2)2*M1)2	1D	2,4C4
RENFAS	Ni(II)	6, 6, 6, 6, 6, 6, 6, 6, 6	octahedron				0, 0, 0	T21, T11	M3, M1	A)9*T21)4*T11)6*M3)2*M1)6	0D	New topology
RENMUT	Cd(II)	6	octahedron				B2	M1		A*B2)2*M1)2	2D	sql
REQGOL	Cu(II)	5	square pyramid				M1, M1	T001		A*T001*M1)2	0D	0D
REWYUP	Cd(II)	6, 6	octahedron				B2, B2	M1		A*B2)2*M1)2	1D	2,4C4
REXROE	Fe(II)	6	octahedron				M1	B01		A*B01)2*M1)2	0D	0D
RIFFET	Cu(II)	5	square pyramid				B2	T001		A*T001*B2	1D	2C1
RIFFOD	Cu(II)	5	square pyramid				B2	T001		A*T001*B2	1D	2C1
RIJXOX	Mn(II)	6	octahedron				B2, B2	M1		A*B2)2*M1)2	1D	(4,4)(0,2)
RIJXUD	Mn(II)	6	octahedron				B2	M1		A*B2)2*M1)2	2D	sql
RITVOG	Ni(II)	6	octahedron				B2	T001	M1	A*T001*B2*M1	1D	2C1
RITWAT	Mn(II)	6	octahedron				M1, M1	B01		A*B01)2*M1)2	0D	0D
RIYHOZ	Mn(II)	6	octahedron				B2, B2, B2			A*B2)3	3D	pcu
RODQOR	Zn(II)	6	octahedron				B2	M1		A*B2)2*M1)2	1D	2,4C4
ROHXIW	Fe(III)	6, 6, 6	octahedron				0			A)7*T201)6*M2)6	0D	3,4,6M13-1
ROHXUI	Mn(II)	6, 6, 6	octahedron				M1	T31, T101	M3	A)3*T31*T101)2*M3*M1	0D	New topology
RORLIV	Cd(II)	6	octahedron				B2, B2	M2		A*B2)2*M2	3D	dia
RORSIC	Zn(II)	4	tetrahedron				B2	B01		A*B2*B01	1D	2C1
ROWBAI	Zn(II)	5	trigonal bipyramid				B2	T001		A*T001*B2	1D	2C1
ROWBEM	Zn(II)	5	trigonal bipyramid				B2	T001		A*T001*B2	1D	2C1
RUNCEL	Eu(III)	8	DTP				M1, M1, M1, M1	M1		A*M1)8	0D	0D
RUNCIP	Dy(III)	8	DTP				M1, M1, M1, M1	M1		A*M1)8	0D	0D
RUPXEG	Ag(I)	4	bisfenoid				B2	B2		A*B2)2	2D	3,5L27
RUSLUN	Fe(II)	6	octahedron				0	T001		A*T001)2	0D	0D
RUVDAO	Mn(III)	6	octahedron				B2	B01		A*B2*B01)2	1D	2C1
RUZBIZ	Mn(II)	6, 6	octahedron				B2	P002		A)2*P002*B2)3	1D	2C1
SABFUX	Mn(II)	6	octahedron				B2, B2, B2			A*B2)3	3D	pcu
SAFYAA	Pr(III)	9	TTP				M1, M1, 0	B01	M1	A*B01)2*M1)5	0D	0D
SAFYEE	Gd(III)	9	TTP				M1, M1, 0	B01	M1	A*B01)2*M1)5	0D	0D
SAFYII	Sm(III)	9	TTP				M1, M1, 0	B01	M1	A*B01)2*M1)5	0D	0D
SAFYOO	Gd(III)	9	TTP				B2, M1	B01	M1	A*B2*B01)2*M1)3	1D	2C1
SAFYUU	Sm(III)	9	TTP				B2, M1	B01	M1	A*B2*B01)2*M1)3	1D	2C1
SAFZAB	La(III)	9	TTP				B2, M1	B01	M1	A*B2*B01)2*M1)3	1D	2C1
SAGHUE	Mn(II)	6	octahedron				M1	B2		A*B2)2*M1)2	1D	2,4C4
SALWAE	Cu(II)	5, 5	trigonal bipyramid				M1, M1	B01		A*B01)2*M1	0D	0D
SASWUG	Ni(II)	6, 6, 6, 6, 6, 6	octahedron				B2	T11, B01	M3, M1	A)6*T11)6*B2)3*B01)2*M3)2*M1)2	0D	New topology
SEBTAV	Cd(II)	6	octahedron				B2	B2	M1	A*B2)2*M1)2	3D	4,6,6T6
SEBTUP	Cd(II)	6	octahedron				B2	M1		A*B2)2*M1)2	1D	2,4C4
SEBVEB	Cd(II)	6, 6, 6	octahedron				B2	B2		A*B2)3	3D	4,6,6T6
SEMJUS	Cu(II)	5					B2	K02	M1	A)2*K02*B2)2*M1)2	2D	hcb
SENJAY	Mn(II)	6	octahedron				B2, B2, B2	M1		A*B2)2*M1)2	2D	sql
SESNEM	Fe(II)	6	octahedron				M1	K0001		A*K0001*M1)2	0D	0D
SESNEM01	Fe(II)	6	octahedron				M1	K0001		A*K0001*M1)2	0D	0D
SESNEM02	Fe(II)	6	octahedron				M1	K0001		A*K0001*M1)2	0D	0D
SESNEM03	Fe(II)	6	octahedron				M1	K0001		A*K0001*M1)2	0D	0D
SESNEM04	Fe(II)	6	octahedron				M1	K0001		A*K0001*M1)2	0D	0D
SESNEM05	Fe(II)	6	octahedron				M1	K0001		A*K0001*M1)2	0D	0D
SESNEM06	Fe(II)	6	octahedron				M1	K0001		A*K0001*M1)2	0D	0D
SEWTIY	Pd(II)	4	square				M1	T001		A*T001*M1	0D	0D
SEWTOE	Pd(II)	4	square				M1	T001		A*T001*M1	0D	0D
SIFFAR	Cd(II)	6	octahedron				B2, B2	B01		A*B2)2*B01	2D	hcb
SINTUF	Co(II)	6	octahedron				M1	B2		A*B2)2*M1)2	1D	2,4C4
SINVAN	Co(II)	6	octahedron				B2, B2	B2		A*B2)3	3D	acs
SIVROG	Mn(II)	6	octahedron				B2, M1	T001	M1	A)2*T001)2*B2*M1)4	0D	1M2-1
SIXGAI	Co(II)	5	square pyramid				B2	T001		A*T001*B2	1D	2C1
SIYXUW	Cu(II)	5	trigonal pyramid				B2, B2	M1		A*B2)2*M1	2D	sql
SOJQUF	Co(II)	6	octahedron				M1	B2		A*B2)2*M1)2	1D	2,4C4
SOTNAR	Cd(II)	6	octahedron				B2	K21		A*K21*B2	3D	fet
SOZQIK	Zn(II)	4, 5	tetrahedron, square pyramid				B2, M1	K0101		A)2*K0101*B2*M1	1D	2C1
SOZQOQ	Zn(II)	4, 5	tetrahedron, square pyramid				B2, M1	K0101		A)2*K0101*B2*M1	1D	2C1
SUNTED	Cd(II)	6	octahedron				B2, B2, B2			A*B2)3	3D	pcu
SUXRUZ	Cu(II)	5	square pyramid				M1	B01		A*B01)2*M1	0D	0D
SUYQAG	Mn(II)	6	octahedron				B2	T001	M1	A*T001*B2*M1	1D	2C1
TABLUF	Ni(II)	6	octahedron				B2	K02	T001	A)2*K02*T001)2*B2	1D	2C1
TABMAM	Zn(II)	5	trigonal bipyramid				B2	T001	B2	A*T001*B2	1D	2C1
TABMEQ	Cu(II)	5	square pyramid				B2	T001		A*T001*B2	1D	2C1
TABMIU	Mn(II)	6	octahedron				B2	T001	M1	A*T001*B2*M1	1D	2C1
TABQOD	Co(II)	6	octahedron	Cu(II)	6	octahedron	B2, B2	K0001		A)2*K0001*B2)4	3D	mab
TABQUJ	Mn(II)	6	octahedron	Cu(II)	6	octahedron	B2, B2	K0001		A)2*K0001*B2)4	3D	mab
TAPTIO	Cu(I)	4	tetrahedron				0	B01		A*B01)2	0D	0D
TAPWEN	Cu(II)	5	square pyramid				M1	B01		A*B01)2*M1	0D	0D
TAQRUB	Cu(II)	5	square pyramid				M1	B01		A*B01)2*M1	0D	0D
TAQWEQ	Co(II)	6	octahedron	Cu(II)	4	square	M1	K0101		A)3*K0101)2*M1)2	0D	1,2M3-1
TAQWIU	Co(II)	6	octahedron	Cu(II)	5, 5	square pyramid	B2, B2	K0101		A)3*K0101)2*B2)2	2D	sql
TAQWOA	Co(II)	6	octahedron	Cu(II)	5	square pyramid	B2	K0101		A)3*K0101)2*B2)2	3D	qtz
TATWAO	Cu(II)	4, 4	square				M1	T11	B01	A)2*T11*B01)2*M1	0D	1M2-1
TATWAO01	Cu(II)	4, 4	square				M1	T11	B01	A)2*T11*B01)2*M1	0D	1M2-1
TATWES	Cu(II)	4, 4	square				M1	T11	B01	A)2*T11*B01)2*M1	0D	1M2-1
TAWFIH	Fe(II)	6	octahedron				M1, M1	B01		A*B01)2*M1)2	0D	0D
TEJXIP	Cu(II)	5	square pyramid				M1	B01		A*B01)2*M1	0D	0D
TEWGUY	Cu(II)	6, 6, 6, 6	octahedron				B2, B2, B2, B2, B2, B2, B2, B2, B2, B2			A*B2)3	2D	sql
TEXVEZ	Cu(II)	5	trigonal bipyramid				B2	T001		A*T001*B2	1D	2C1
TEYNAN	Eu(III)	8	BTP				B2, B2, B2	M1		A*B2)3*M1)2	2D	sql
TEYNER	Tb(III)	8	BTP				B2, B2, B2	M1		A*B2)3*M1)2	2D	sql
TICBIQ	Ni(II)	6, 6	octahedron				M1, M1	M1		A*M1)6	0D	0D
TIRGUZ	Cu(II)	5	trigonal bipyramid				B2	T001		A*T001*B2	1D	2C1
TIRWOI	Mn(II)	6	octahedron				B2	K0001		A*K0001*B2	1D	2C1
TIRWUO	Mn(II)	7	OTP				B2	K0001	M1	A*K0001*B2*M1	1D	2C1
TOGNIO	Cu(II)	4, 5, 5					M1	T11	M4	A)3*T11)3*M4*M1	0D	3,4M8-3
TOLDEE	Cd(II)	6	octahedron				M1	B2		A*B2)2*M1)2	2D	sql
TOLDOO	Ni(II)	6	octahedron				M1	B2		A*B2)2*M1)2	2D	sql
TOLFAC	Zn(II)	6	octahedron				B2	B2		A*B2)3	2D	sql
TOLFEG	Ag(I)	6, 4, 3	octahedron, square, triangle				B2	K21		A)3*K21)2*B2)3	2D	3,4L90
TONDAE	Co(II)	6	octahedron				M1, M1	K0001		A*K0001*M1)2	0D	0D
TONDEH	Cu(II)	4, 5	square, square pyramid				B2	B11	M1	A)2*B2*B11)2*M1	1D	2C1
TONDOR	Cu(II)	5, 5	square pyramid				T3	B11	M1	A)2*T3*B11)2*M1	2D	hcb
TUBRAL	Ni(II)	6, 6	octahedron				B2, B2	B2		A*B2)3	3D	pcu
TUCDUR	Ir(III)	6	octahedron				M1	B01	M1	A*B01)2*M1)2	0D	0D
TUGROD	Cd(II)	6, 6	octahedron				M1, M1, 0	B2	M1	A*B2)2*M1)2	0D	1,2M3-1
TUGRUJ	Cd(II)	6, 6	octahedron				B2, B2	B2	M1	A)3*B2)7*M1)4	1D	2C1
TUTNII	Ag(I)	4, 4	tetrahedron				B3, M1	B2		A)2*B3*B2)2*M1	0D	2M4-1
TUYPUA	Fe(II)	6	octahedron				M1	M1		A*M1)6	0D	0D
UDERUS	Co(II)	6	octahedron	Ni(II)	5	square pyramid	B2	K0101		A)3*K0101)2*B2)2	2D	sql
UDESAZ	Co(II)	6	octahedron	Ni(II)	5, 6	square pyramid, octahedron	B2	K0101	K1101	A)3*K1101*K0101*B2)2	2D	cpr
UDOKON	Mn(II)	6	octahedron				M1	M1		A*M1)6	0D	0D
UDOKUT	Mn(II)	6	octahedron				B2	M1		A*B2)2*M1)2	1D	sql
UFUYUQ	Co(II)	4	square	Ni(II)	6	octahedron	B2, B2	K0101		A)2*K0101*B2)2	2D	hcb
UGILED	Co(II)	6	octahedron				M1	B2		A*B2)2*M1)2	1D	2,4C4
UKEMEC	Mn(II)	7	pentagonal bipyramid				B2	P00001		A*P00001*B2	1D	2C1
UKUHAJ	Co(II)	6, 6	octahedron				T3, B2	M1		A*T3*B2*M1	2D	3,4,4L13
UKUHEN	Co(II)	6, 6	octahedron				T3, B2	M1		A*T3*B2*M1	2D	3,4,4L13
ULOPET	Ni(II)	6	octahedron				B2	K0001		A*K0001*B2	1D	2C1
UMETOW	Cd(II)	6	octahedron				M1	B01		A*B01)2*M1)2	0D	0D
UMETUC	Hg(II)	5, 4, 4, 4	square pyramid, bisfenoid				T3, B2, B2	B2		A)4*T3*B2)7	3D	3,3,4T36
UNEQOU	Mn(II)	6	octahedron				B2	M1		A*B2)2*M1)2	1D	2,4C4
UQIDIJ	Mn(II)	6, 6	octahedron				B2, B2, B2	P002		A)2*P002*B2)3	2D	hcb
UQOXEF	Zn(II)	6	octahedron				M1	B01		A*B01)2*M1)2	0D	0D
UQOYOP	Zn(II)	6	octahedron				B2	B2		A*B2)3	3D	pcu
URANUZ	Co(II)	6	octahedron				B2, B2	B01		A*B2)2*B01	2D	hcb
URAPAH	Ni(II)	6	octahedron				B2, B2	B01		A*B2)2*B01	2D	hcb
URAZUK	Cu(I), Cu(II)	3, 5	triangle, square pyramid				B2, B2	B01		A)2*B2)2*B01)2	1D	2C1
URIPIV	Cu(II)	5	trigonal pyramid				B2, M1	B2		A*B2)2*M1	2D	sql
UVOWEI	Ru(III)	6	octahedron				B2	T001	M1	A)2*T001)2*B2*M1)4	0D	1M2-1
UVUKON	Cd(II)	6	octahedron				M1	B01		A*B01)2*M1)2	0D	0D
UVULAA	Cd(II)	6	octahedron				B2	B01		A*B2*B01)2	1D	2C1
UWISID	Pb(II)	9	TTP				B4, B2	T001		A*T001*B4*B2	1D	4,6C15
UXUREM	Co(II)	6	octahedron				M1	M1		A*M1)6	0D	0D
UYOJAU	Cd(II)	6	octahedron				M1	B2		A*B2)2*M1)2	1D	2,4C4
VAKVUZ	Cu(II)	6	octahedron				M1	B01		A*B01)2*M1)2	0D	0D
VALFAQ	Cd(II)	6	octahedron				B2	B2		A*B2)3	3D	pcu
VALFAQ01	Cd(II)	6	octahedron				B2	B2		A*B2)3	3D	cds
VALFEU	Cd(II)	6	octahedron				0	B2	M2	A*B2)2*M2	2D	sql
VALFIY	Cd(II)	6	octahedron				0	B2	M2	A*B2)2*M2	2D	sql
VEBXUX	Cu(II)	5, 5	square pyramid				0, 0	P011		A*P011	0D	1M2-1
VEFRUV	Zn(II)	6	octahedron				B2	M1		A*B2)2*M1)2	1D	2,4C4
VEFSAC	Cd(II)	6	octahedron				B2	M1		A*B2)2*M1)2	1D	2,4C4
VETCAZ	Co(II)	6, 6	octahedron				B2, B2, B2, B2, B2	M1		A*B2)2*M1)2	2D	sql
VETCED	Cd(II)	6	octahedron				B2	M1		A*B2)2*M1)2	2D	sql
VETCIH	Fe(II)	6	octahedron				B2	M1		A*B2)2*M1)2	2D	sql
VETCON	Co(II)	6	octahedron				B2	M1		A*B2)2*M1)2	2D	sql
VETCUT	Cd(II)	6	octahedron				M1, M1	B01		A*B01)2*M1)2	0D	0D
VEWBUW	Zn(II)	6, 6	octahedron	Fe(II)	6	octahedron	B2	B01		A*B2)3+A*B01)3	2D	hcb
VEWCAD	Fe(II)	6	octahedron				0	B01		A*B01)3	0D	0D
VEWRUL	Ni(II)	5, 5					B2, B2	T001		A*T001*B2	1D	2C1
VEYREX	Co(II)	6	octahedron				B2	B2		A*B2)3	3D	sra
VEYRIB	Co(II)	6	octahedron				B2, 0	K02		A*K02*B2	3D	dia
VIGNUW	Fe(II)	6, 6, 6	octahedron				B2, B2, B2, M1, M1, 0	K0001		A*K0001*B2+A*K0001*M1)2	0D, 0D	2M4-1, 0D
VIGNUW01	Fe(II)	6, 6, 6	octahedron				B2, B2, B2, M1, M1, 0	K0001		A*K0001*B2+A*K0001*M1)2	0D, 0D	2M4-1, 0D
VIGNUW02	Fe(II)	6, 6, 6	octahedron				B2, B2, B2, M1, M1, 0	K0001		A*K0001*B2+A*K0001*M1)2	0D, 0D	2M4-1, 0D
VILYEV	Cd(II)	6, 6	octahedron				M1	G00101		A)3*G00101)2*M1)2	0D	1,2M3-1
VINMUD	Cd(II)	6	octahedron				B2, B2			A*B2)3	3D	pcu
VOBLEE	Co(II)	4	square	Cu(II)	5	square pyramid	B2, M1			A)2*K0101*B2*M1	1D	2C1
VOLGOU	Fe(II)	6	octahedron				0	B2		A*B01)3	0D	0D
VOLGUA	Fe(II)	6	octahedron				0	B2		A*B01)3	0D	0D
VOMQUL	Mn(II)	6	octahedron				B2	M1		A*B2)2*M1)2	2D	sql
VOMXAY	Co(II)	6	octahedron				M1, M1	B01		A*B01)2*M1)2	0D	0D
VOMXEC	Co(II)	6	octahedron				M1, M1	B01		A*B01)2*M1)2	0D	0D
VOMYAZ	Co(II)	6	octahedron				B2	B01		A*B2)2*B01	1D	2,4C4
VONQIA	Cu(II)	4, 5					B2	G102		A)2*G102*B2	1D	(4,4)(0,2)
VORNAR20	Cu(I)	3	triangle				M1	B2		A*B2*M1	1D	2C1
VORNAR22	Cu(I)	3	triangle				M1	B2		A*B2*M1	1D	2C1
VORNAR23	Cu(I)	3	triangle				M1	B2		A*B2*M1	1D	2C1
VORNAR24	Cu(I)	3	triangle				M1	B2		A*B2*M1	1D	2C1
VORNAR24	Cu(I)	3	triangle				M1	B2		A*B2*M1	1D	2C1
VORNAR26	Cu(I)	3	triangle				M1	B2		A*B2*M1	1D	2C1
VOXHUO	Ni(II)	6	octahedron				B2			A*B2)3	3D	pcu
VUNGOB	Mn(II)	6, 6	octahedron	Cu(II)	5	square pyramid	B2, B2, B2, M1	K0001	M1	A*K0001*M1+A*B2)2*M1)2	2D, 0D	kgd, 0D
VUNGUH	Mn(II)	6	octahedron	Cu(II)	5	square pyramid	B2, B2, B2, M1	K0001		A)2*K0001*B2)3*M1	2D	sql
VUNTUW	Gd(III)	8	BTP				M1	B01	M2, M1	A*B01)2*M2*M1)2	0D	1M2-1
VUNVAE	Eu(III)	9	TTP				B2, M1	B01	M1	A*B2*B01)2*M1)3	1D	2C1
VUNVEI	Nd(III)	9	TTP				B2, M1	B01	M1	A*B2*B01)2*M1)3	1D	2C1
VUXPIP	Cu(II)	6	octahedron				B2	K02	B01	A)2*K02*B2)2*B01)2	2D	hcb
VUYNOU	Cd(II)	6	octahedron				M1	K4	M1	A*K4*M1)2	2D	sql
VUYTUF	Cu(II)	6	octahedron				M1, M1	B01		A*B01)2*M1)2	0D	0D
VUZTIT	Pb(II)	9	TTP				T4, T5			A*T5*T4	3D	4,5,9T2
WAFSOM	Co(II)	6	octahedron				B2	M1		A*B2)2*M1)2	1D	2,4C4
WAFSUS	Co(II)	6, 6, 6	octahedron				M1	B2	B11	A)3*B2)5*B11)2*M1)2	1D	3,4C26
WAHXEK	Cu(II)	4, 4, 4	square				0	K0001		A*K0001	0D	0D
WARFEB	Pb(II)	8, 9	BTP, TTP				M1	B3, B2	B01	A*B3*B2*B01*M1 + A*B3*B2*B01)2	2D	3,5L2
WASMIP	Fe(II)	6	octahedron				B2, B2	K4		A)2*K4*B2)4	3D	sqc173
WASMIP01	Fe(II)	6	octahedron				B2, B2	K4		A)2*K4*B2)4	3D	sqc173
WATGII	Zn(II)	6	octahedron				M1, M1	B2		A*B2)2*M1)2	1D	2,4C4
WEHJAV	Cu(I)	3	triangle				B2	M1		A*B2*M1	1D	2C1
WEHJAV01	Cu(I)	3	triangle				B2	M1		A*B2*M1	1D	2C1
WEHJAV02	Cu(I)	3	triangle				B2	M1		A*B2*M1	1D	2C1
WEHJAV03	Cu(I)	3	triangle				B2	M1		A*B2*M1	1D	2C1
WEHJAV04	Cu(I)	3	triangle				B2	M1		A*B2*M1	1D	2C1
WEHJAV05	Cu(I)	3	triangle				B2	M1		A*B2*M1	1D	2C1
WEHJAV06	Cu(I)	3	triangle				B2	M1		A*B2*M1	1D	2C1
WEKLIK	Cu(II), Cu(I)	3, 5	triangle, square pyramid				B2, B2	B01	M2	A)2*B2)2*B01*M2	2D	KIa
WELNEH	Mn(II)	6	octahedron				B2	M1		A*B2)2*M1)2	1D	2,4C4
WELNIL	Mn(II)	6	octahedron				B2	M1		A*B2)2*M1)2	1D	2,4C4
WENJEE02	Cu(I)	3	triangle				B2	M1		A*B2*M1	1D	2C1
WEPFON	Cu(II)	4	square				0, 0	B01		A*B01)2	0D	0D
WEQTOC	Co(II)	6	octahedron				B2	B2		A*B2)3	2D	sql
WEQTUI	Co(II)	6	octahedron				M1	B2		A*B2)2*M1)2	2D	sql
WEQVAQ	Co(II)	6	octahedron				M1	B2		A*B2)2*M1)2	2D	sql
WEYXII	Cu(II)	6	octahedron				M1	B2		A*B2)2*M1)2	1D	2,4C4
WIBHUM	Mn(II)	6	octahedron				0	T001		A*T001)2	0D	0D
WIBKEZ	Ni(II)	5	trigonal bipyramid				B2	T001		A*T001*B2	0D	2M6-1
WIDGOG	Fe(II)	6	octahedron				M1	K0001		A*K0001*M1)2	0D	0D
WIGWAL	Zn(II)	6	octahedron				M1, M1	B01		A*B01)2*M1)2	0D	0D
WIHDID	Fe(II)	6	octahedron				0	T001		A*T001)2	0D	0D
WINQES	Cu	5	square pyramid				B2, M1	B01		A*B2*B01*M1	0D	1M2-1
WINXOH	Mn(II)	6, 6, 6	octahedron	Mn(II)	6	octahedron	B2, B2	B01		A*B2)3+A*B01)3	2D	hcb
WIRJUC	Cu(II)	5	trigonal bipyramid				M1	B01		A*B01)2*M1	0D	0D
WITGOY	Cu(II)	6	octahedron				M1	B01		A*B01)2*M1)2	0D	0D
WITGUE	Ni(II)	6	octahedron				M1, M1	B01		A*B01)2*M1)2	0D	0D
WITHAL	Co(II)	6	octahedron				M1, M1	B01		A*B01)2*M1)2	0D	0D
WITHEP	Mn(II)	6	octahedron				M1, M1	B01		A*B01)2*M1)2	0D	0D
WITHIT	Co(II)	6	octahedron				M1	B01		A*B01)2*M1)2	0D	0D
WIZFIV	Cu(II)	5	trigonal bipyramid				M1	B01		A*B01)2*M1	0D	0D
WOCREO	Zn(II)	4, 5	tetrahedron, square pyramid				B2, M1	K0101		A)2*K0101*B2*M1	0D	2M4-1
WOCRIS	Zn(II)	4, 5	tetrahedron, square pyramid				B2, M1	K0101		A)2*K0101*B2*M1	0D	2M4-1
WOGRUF	Co(II)	6	octahedron				T3	T3		A*T3)2	3D	3,3,6T12
WOGSEQ	Cu(II)	6	octahedron				T3	T3		A*T3)2	3D	3,3,6T12
WOGSEQ01	Cu(II)	6	octahedron				T3	T3		A*T3)2	3D	3,3,6T12
WOLHEM	Cu(II)	5, 5					B2	T001	B2	A*T001*B2	1D	2C1
WOMHAK	Mn(II)	6	octahedron				B2			A*B2)3	3D	pcu
WOQLEU	Cd(II)	6	octahedron				B2	M1		A*B2)2*M1)2	1D	2,4C4
WOTMUQ	Cu(II)	6	octahedron				M1, M1	K4		A*K4*M1)2	2D	sql
WOZKUU	Co(II)	6	octahedron				B2	M1		A*B2)2*M1)2	2D	sql
WOZLAB	Co(II)	6, 6	octahedron				B2, B2, B2	B2	M1	A)3*B2)5*M1)8	2D	bex
WOZXEO	Ni(II)	6	octahedron				0	B01		A*B01)3	0D	0D
WOZXOA	Co(II)	6	octahedron				B2	M1		A*B2)2*M1)2	2D	sql
WUDWUQ	Fe(II)	7	pentagonal bipyramid				M1, M1	P00001		A*P00001*M1)2	0D	0D
WUJKOB	Cd(II)	6	octahedron				B2	B2		A*B2)3	1D	2,6C???
WUJKUH	Cd(II)	6	octahedron				B2	B2		A*B2)3	2D	sql
WUJLOC	Mn(II)	6	octahedron				B2	M1		A*B2)2*M1)2	2D	sql
WUJLUI	Mn(II)	6	octahedron				B2	B2		A*B2)3	1D	2,6C???
WUQHEV	Cd(II)	6	octahedron				B2	M1		A*B2)2*M1)2	1D	2,4C4
WUQQUX	Mn(II)	6	octahedron				B2, B2, M1			A*B2)2*M1)2	2D	sql
WUQQUX01	Mn(II)	6	octahedron				B2, B2, M1			A*B2)2*M1)2	2D	sql
WUQROS	Ni(II)	6	octahedron				B2, B2, M1			A*B2)2*M1)2	2D	sql
WUQRUY	Co(II)	6	octahedron				B2, B2, M1			A*B2)2*M1)2	2D	sql
WURKOJ	Fe(II)	8					M1	P00001	B01	A*P00001*B01*M1	0D	0D
WURKUP	Fe(II)	8, 8					B2	P00001	B01	A)2*P00001)2*B2*B01)2	0D	1M2-1
WURLAW	Ru(II)	8, 8					B2	P00001	M1	A)2*P00001)2*B2*M1)4	0D	1M2-1
WURSUY	Pb(II)	7	OTP				B2	B11	B01	A*B11*B2*B01	1D	(3,6)(1,2)
WURTAF	Pb(II)	7	OTP				B2	B11	B01	A*B11*B2*B01	1D	(3,6)(1,2)
WUTPAF	Ni(II)	6, 6	octahedron				B2, B2, B2, B2, M1, M1			A*B2)2*M1)2	3D	dia
WUTRIO	Cu(II)	5, 5	square pyramid				M1, M1	H0002		A)2*H0002*M1)2	0D	1M2-1
WUTROU	Cu(II)	5, 5	square pyramid				M1, M1	H0002		A)2*H0002*M1)2	0D	1M2-1
WUXTIU	Cd(II)	6	octahedron				B2, B2	M1		A*B2)2*M1)2	2D	hcb
WUYJIL	Cu(II)	6	octahedron				B2	M1		A*B2)2*M1)2	2D	sql
WUYKAC	Pb(II)	8	BTP				B3	B11	B01	A*B11*B3*B01	2D	bey
WUYKEG	Pb(II)	8	BTP				B3, M1	B2	B01	A*B3*B2*B01*M1	1D	3,5C1
WUYQOY	Cu(II)	4, 6					B2, B2	M2		A)2*B2)4*M2	3D	4,6T594
XANHEA	Ni(II)	6	octahedron				B2, M1	G002		A)2*G002*B2)2*M1)2	1D	(4,4)(0,2)
XANHIE	Co(II)	6	octahedron				B2, M1	G002		A)2*G002*B2)2*M1)2	1D	2,4C4
XANHOK	Cu(II)	5	square pyramid				B2, 0	G002	M1	A)2*G002*B2*M1)2	1D	2C1
XANZUH	Co(II)	6	octahedron				B2, B2	M2		A*B2)2*M2	3D	sqp
XAPBAR	Ni(II)	6	octahedron				B2, B2	M2		A*B2)2*M2	3D	sqp
XAPBEV	Mn(II)	6	octahedron				B2, B2	M2		A*B2)2*M2	3D	sqp
XAZFEM	Cd(II)	6	octahedron				B2, M1	T001		A*T001*B2*M1	1D	2C1
XAZFIQ	Cd(II)	6	octahedron				M1	T001	M2	A*T001*M2*M1	0D	1M2-1
XEGHEX	Mn(II)	6	octahedron				B2	M1		A*B2)2*M1)2	1D	2,4C4
XEGHIB	Co(II)	6	octahedron				B2	M1		A*B2)2*M1)2	1D	2,4C4
XEGHOH	Co(II)	6	octahedron				B2	B2		A*B2)3	1D	2,6C???
XEHHAV	Ni(II)	4, 6, 6	square, octahedron				M1	P201	K201, M1	A)5*P201)2*K201)2*M1)6	0D	1,4M5???
XEHHEZ	Ni(II)	4, 4, 6, 6, 6, 6	square, octahedron				M1	P401	P201, M1	A)10*P401)4*P201)4*M1)4	0D	New topology
XEPLEL	Co(II)	6	octahedron				B2, 0	T001	M1	A*T001*B2*M1	1D	2C1
XEPLIP	Co(II)	6	octahedron				B2, M1	G002		A)2*G002*B2)2*M1)2	1D	(4,4)(0,2)
XEQGEI	Cu(II)	4, 4	square	Mn(II)	6	octahedron	B2	K0101	M1	A)6*K0101)4*B2*M1)2	0D	1,2M6???
XEQGIM	Cu(II)	4	square	Mn(II)	6	octahedron	M1	K0101		A)3*K0101)2*M1)2	0D	1,2M3-1
XEYXIK	Ni(II)	6	octahedron				B2, M1	T001		A*T001*B2*M1	1D	2C1
XEYXOQ	Co(II)	6	octahedron				B2, M1	T001		A*T001*B2*M1	1D	2C1
XIBHUM	Cu(II)	4, 4, 4, 4	tetrahedron	W	4	tetrahedron	B2, B2	B01	M3	A)5*B2)2*B01)2*M3)4	3D	dmp
XICDAQ	Cd(II)	6	octahedron				M1	B2		A*B2)2*M1)2	1D	2,4C4
XICLIG	Mo	6, 6, 6	octahedron				M1, M1, M1	B01	M3, M2	A)3*B01)3*M3*M2)3*M1)3	0D	2M3-1
XICLOM	Mo	6, 6, 6	octahedron				M1, M1, M1	B01	M3, M2	A)3*B01)3*M3*M2)3*M1)3	0D	2M3-1
XICLUS	Mo	6, 6, 6	octahedron				M1	B01	M3, M2, M1	A)3*B01)3*M3*M2)3*M1)3	0D	2M3-1
XIFGAW	Cd(II)	6, 6	octahedron				B2	T101	B01	A)2*T101)2*B2*B01	1D	2C1
XIFPEJ	Co(II)	6	octahedron				B2	B2		A*B2)3	2D	sql
XIFXEQ	Cu(II)	5, 5					B2, B2	B11		A*B2*B11	2D	hcb
XIHQEL	Mn(II)	6	octahedron				B2, B2	B01		A*B2)2*B01	1D	(4,4)(0,2)
XIHQIP	Cd(II)	6	octahedron				B2, B2	B01		A*B2)2*B01	1D	(4,4)(0,2)
XIHQOV	Cd(II)	6	octahedron				B2, B2	B01		A*B2)2*B01	1D	(4,4)(0,2)
XIJZEY	Cd(II)	6	octahedron	Cu(II)	4	square	B2, B2	K0101		A)2*K0101*B2)2	2D	sql
XIJZIC	Ni(II)	6	octahedron	Mn(II)	4	tetrahedron	B2, B2	K0101		A)2*K0101*B2)2	2D	hcb
XIJZOI	Ni(II)	6	octahedron	Mn(II)	6	octahedron	B2	G0002		A)2*G0002*B2)2	1D	(4,4)(0,2)
XIKGEG	Cd(II)	6	octahedron				B2, B2			A*B2)3	3D	pcu
XIKGEG01	Cd(II)	6	octahedron				B2, B2, B2, B2			A*B2)3	3D	pcu
XIKGEG02	Cd(II)	6	octahedron				B2, B2			A*B2)3	3D	pcu
XIKGEG03	Cd(II)	6	octahedron				B2, B2			A*B2)3	3D	pcu
XIKXAT	Cd(II)	7, 7, 7	pentagonal bipyramid	Cu(II)	4, 5, 5	square, square pyramid	B2, B2, M1	G0002		A)6*G0002)3*B2)5*M1	1D	2C1
XILHUY	Zn(II)	4	tetrahedron	Cu(II)	5	square pyramid	B2, M1	K0101		A)2*K0101*B2*M1	0D	2M4-1
XIPROE	Co(II)	6	octahedron				B2, B2	B01		A*B2)2*B01	2D	hcb
XISDAF	Cu(II)	4	square				M1	T001		A*T001*M1	0D	0D
XITBUA	Mn(II)	6	octahedron				B2, B2			A*B2)3	2D	sql
XITBUA01	Mn(II)	6	octahedron				B2, B2			A*B2)3	2D	sql
XITBUA02	Mn(II)	6	octahedron				B2, B2, B2			A*B2)3	2D	sql
XITCIP	Cd(II)	6	octahedron				B2, B2			A*B2)3	2D	sql
XITCIP01	Cd(II)	6	octahedron				B2, B2, B2			A*B2)3	2D	sql
XIWCAJ	Mn(II)	5, 6, 6, 6	square pyramid, octahedron				M1, M1	T101	M3, M2, M1	A)4*T101)3*M3*M2)2*M1)4	0D	M4???
XIZPIF	Cu(II)	5	trigonal bipyramid				B2, B2	B2		A)2*B2)5	3D	nov
XOGCEC	Ni(II)	6	octahedron				B2	K0001		A*K0001*B2	1D	2C1
XOGLOU	Co(II)	6, 6, 6	octahedron				B2, B2	B2	M1	A)3*B2)4*M1)10	1D	(4,4)(0,2)
XOLVOM	Ni(II)	6	octahedron				B2	M1		A*B2)2*M1)2	2D	sql
XOLVOM01	Ni(II)	6	octahedron				B2	M1		A*B2)2*M1)2	2D	sql
XOLVUS	Co(II)	6	octahedron				B2	M1		A*B2)2*M1)2	2D	sql
XOYNUW	Ni(II)	5, 5, 6	square pyramid, octahedron				B2, B2	K0101		A)3*K0101)2*B2)2	2D	sql
XOYPAE	Ni(II)	6	octahedron	Zn(II)	4	tetrahedron	B2	K0101		A)3*K0101)2*B2)2	2D	hcb
XOYQEJ	Ni(II)	5, 6	square pyramid, octahedron	Cd(II)	6	octahedron	B2	K1101	K0101	A)3*K1101*K0101*B2)2	2D	cpr
XUFRAT	Cd(II)	6, 6	octahedron				B2, B2, B2, B2	T001		A)3*T001)2*B2)6	2D	kgd
XUFZUV	Cu(II)	5	square pyramid				B2, M1	B01		A*B2*B01*M1	0D	1M2-1
XUFZUV01	Cu(II)	5	square pyramid				B2, M1	B01		A*B2*B01*M1	0D	1M2-1
XUFZUV02	Cu(II)	5	square pyramid				B2, M1	B01		A*B2*B01*M1	0D	1M2-1
XUGJOY	Cu(II)	5	trigonal bipyramid				M1	B01		A*B01)2*M1	0D	0D
XUGJOY01	Cu(II)	5	trigonal bipyramid				M1	B01		A*B01)2*M1	0D	0D
XUGJUE	Cu(II)	5, 5	trigonal bipyramid				B2	B01		A)2*B2*B01)4	0D	1M2-1
XULBAI	Zn(II)	6	octahedron				M1	B2		A*B2)2*M1)2	1D	2,4C4
XULBAI01	Zn(II)	6	octahedron				M1	B2		A*B2)2*M1)2	1D	2,4C4
XURLAA	Co(II)	6	octahedron				M1	B01		A*B01)2*M1)2	0D	0D
XUTREL	Co(II)	6	octahedron				M1	B01		A*B01)2*M1)2	0D	0D
XUTYOC	Ni(II)	6	octahedron				M1	B01		A*B01)2*M1)2	0D	0D
XUVQEN	Co(II)	6	octahedron				M1, M1	K0001		A*K0001*M1)2	0D	0D
XUVQEN01	Co(II)	6	octahedron				M1, M1	K0001		A*K0001*M1)2	0D	0D
XUYDEB	Cd(II)	6	octahedron				M1	B2		A*B2)2*M1)2	1D	2,4C4
YAQBOJ	Co(II)	6	octahedron				B2, B2	B01		A*B2)2*B01	3D	dia
YAQBUP	Ni(II)	6	octahedron				B2, B2	B01		A*B2)2*B01	3D	dia
YAQXUK	Mn(II)	6, 6, 6, 6	octahedron				M1, M1	T12	M1	A*T12*M1	0D	3M4-1
YAQYAR	Ni(II)	6, 6, 6, 6	octahedron				M1, M1	T12	M1	A*T12*M1	0D	3M4-1
YAQYEV	Co(II)	6	octahedron				0	T001		A*T001)2	0D	0D
YARZEZ01	Cd(II)	6	octahedron				B2, B2, B2			A*B2)3	3D	pcu
YEBPOL	Cu(II)	4, 5	square, square pyramid	Pr(III)	10		M1	G0002	K02	A)6*G0002)4*K02*M1)2	0D	1,3M6??
YEFDIZ	Cu(II)	5, 5	trigonal bipyramid				B2	K0101	M2	A)2*K0101*B2*M2	2D	hcb
YEJQOU	Cu(II)	5, 6	square pyramid, octahedron				M1, M1	H003		A)2*H003*M1)2	0D	1,3M8??
YENMEK	Ru(II)	6	octahedron				M1	M1	M1	A*M1)6	0D	0D
YENMOU	Ru(II)	6	octahedron				M1, M1	M1		A*M1)6	0D	0D
YENMUA	Ru(II)	6	octahedron				M1	M1	M1	A*M1)6	0D	0D
YENNEL	Ru(II), Ru(III)	6, 6	octahedron				M1	M1	M1	A)2*B2*M1)10	0D	1M2-1
YENNOV	Ru(II), Ru(III)	6, 6	octahedron				M1	M1	M1	A)2*B2*M1)10	0D	1M2-1
YENSAM	Mn(II)	6	octahedron				M1	M1	M1	A*T001*B01*M1)2	0D	0D
YENSAM01	Mn(II)	6	octahedron				M1	M1	M1	A*T001*B01*M1)2	0D	0D
YENSEQ	Zn(II)	5	square pyramid				M1, M1	T001		A*T001*M1)2	0D	0D
YEQREU	Mn(II)	6	octahedron				B2, B2	M1	M1	A*B2)2*M1)2	2D	hcb
YESWEB	Zn(II)	6	octahedron				M1	M1	M1	A*M1)6	0D	0D
YETDEH	Cu(II)	4	tetrahedron				M1	T001		A*T001*M1	0D	0D
YETFAF	Zn(II)	4	tetrahedron				M1	T001		A*T001*M1	0D	0D
YETFEJ	Zn(II)	5	trigonal bipyramid				B2	T001		A*T001*B2	1D	2C1
YEVPEV	Cd(II)	6, 6	octahedron				B2	G001001	M1	A)2*G001001*B2*M1	1D	2C1
YIBTOU	Cu(II)	5	square pyramid				B2	T001		A*T001*B2	1D	2C1
YIBTUA	Cu(II)	5	square pyramid				B2	T001		A*T001*B2	1D	2C1
YIBVAI	Cu(II)	5	square pyramid				B2	T001		A*T001*B2	1D	2C1
YIBVEM	Cu(II)	4, 4	square				M1, M1	T001		A*T001*M1	0D	0D
YIDMEF	Ag(I)	5	trigonal bipyramid				0, B3	K02		A)2*K02*B3)2	2D	bey
YIDMIJ	Ag(I)	4, 4, 5	tetrahedron, trigonal bipyramid				B2, B2, M1	K02		A)3*K02*B2)4*M1	1D	3,4C26
YIDMOP	Ag(I)	4, 5	tetrahedron, trigonal bipyramid				T4, B2, M1	K02		A)4*K02*T4)2*B2)2*M1)2	2D	3,4,4L112
YIVXAE	Co(II)	6	octahedron	Cu(II)	5	square pyramid	B2	K0101		A)3*K0101)2*B2)2	2D	sql
YIVXEI	Ni(II)	6	octahedron	Cu(II)	5	square pyramid	B2	K0101		A)3*K0101)2*B2)2	2D	sql
YIVXIM	Zn(II)	6	octahedron	Cu(II)	5	square pyramid	B2	K0101		A)3*K0101)2*B2)2	2D	sql
YODCOK	Cd(II)	6	octahedron				B2	B01		A*B2)2*B01	1D	2,4C1
YOMVON	Cu(II)	6	octahedron				B2	B01		A*B2*B01)2	1D	2C1
YOPDUE	Cu(II)	5	trigonal bipyramid				B2	T001		A*T001*B2	1D	2C1
YOPFAM	Zn(II)	5	trigonal bipyramid				B2	T001		A*T001*B2	1D	2C1
YOTTUZ	Cd(II)	6	octahedron				B2, B2	M1		A*B2)2*M1)2	1D	2,4C4
YOTVEL	Cd(II)	6	octahedron				B2, B2	M1		A*B2)2*M1)2	2D	sql
YUDNAP	Co(II)	6	octahedron				B2	K0001		A*K0001*B2	1D	2C1
YUDNET	Cd(II)	6	octahedron				B2	K0001		A*K0001*B2	1D	2C1
YUSROU	U(VI)	7	pentagonal bipyramid				B2, M1	M1	M1	A*B2*M1)5	0D	1M2-1
ZEYVUW	Mn(II)	7	OTP				B2	T001	B01	A*T001*B2*B01	1D	2C1
ZEYWOR	Mn(II)	6	octahedron				M1	T001	M1	A*T001*M1)3	0D	0D
ZIFFUS	Zn(II)	5, 5, 6	trigonal bipyramid, octahedron				M1, M1	P0011		A)3*P0011)2*M1)2	0D	1,2M3-1
ZIRWAA	Cu(II)	5	square pyramid				M1	T101		A*T101*M1	0D	1M2-1
ZIWZOX	Co(III)	6	octahedron				M1	P00001		A*P00001*M1	0D	0D
ZIXBIU	Co(III)	6	octahedron				M1	P00001		A*P00001*M1	0D	0D
ZUKMUP	Co(II)	6	octahedron				B2	M1		A*B2*M1)4	1D	2C1
ZUNMIH	Co(II)	6	octahedron				B2	T001	M1	A*T001*B2*M1	1D	2C1
AMIMER	Cd(II)	6	octahedron				B2, B2	B2		A*B2)3	3D	rob
AMIMIV	Cd(II)	6, 6	octahedron				T3, B2, B2	M1	M1	A)3*T3)2*B2)4*M1)4	1D	New topology
AMIMOB	Cd(II)	6, 6	octahedron				B2, B2	M1		A*B2)2*M1)2	1D	2,4C4
AMIMUH	Cd(II)	6	octahedron				B2, B2	B01		A*B2)2*B01	1D	(4,4)(0,2)
AMINAO	Cd(II)	6	octahedron				B2, B2	B01		A*B2)2*B01	3D	dia
AMINES	Cd(II)	6	octahedron				M1	B01		A*B01)2*M1)2	0D	0D
AQIHUG	Cu(II)	6	octahedron				B2	M1		A*B2)2*M1)2	2D	sql
AQIJAO	Co(II)	6	octahedron				B2	M1		A*B2)2*M1)2	2D	sql
AQIJES	Mn(II)	6	octahedron				B2	M1		A*B2)2*M1)2	2D	sql
ASEZEG	Cu(II)	5	square pyramid	Zn(II)	6	octahedron	B2	K0101		A)3*K0101)2*B2)2	1D	2,4C4
EPEMOE	Cu(II)	5, 5	square pyramid				B2, B2	K0101		A)2*K0101*B2)2	2D	sql

## Sheet: Table S2
Table S2. Distribution of complex dimensionalities over the coordination type of dca-anions
			No of cmpds. with a given dimentionality
dca-Denticity	No of complexes	No of indep.ligands	0D	1D	2D	3D
0	64	76	59	5	4	8
1	485	597	429	130	33	36
2	864	1334	80	433	430	618
3	46	54	0	5	12	43
4	6	6

## Sheet: Table S3
Table S3. Distribution of complex dimensionalities over the coordination type of co-ligands
		No of Cmpds with a given dimentionality of a complex
	Coordination mode	0D	1D	2D	3D
uncoordinated	0	0	14	30	88
terminal	M1	131	169	106	13
bridge	M2	23	8	7	6
	M3	12	3	3	3
	M4	1	0	1	0
	B2	18	65	58	55
	T3	4	1	2	5
	K4		0	4	3
bridge-chelate	B02	2	0	0	0
	B21	1	5	5	0
	B11	3	8	7	1
	T101	11	3	1	0
	T11	7	6	5	3
	T12	2	0	0	0
	T21	1	0	0	0
	T31	1	0	0	0
	T02	3	1	1	0
	K111	1	0	0	0
	K011	3	0	0	0
	K02	1	10	8	2
	K21	0	0	2	1
	K101	1	3	1	2
	K12	1	1	0	0
	K1001	2	1	0	0
	K0101	21	9	23	2
	K201	1	0	0	0
	P0011	2	0	0	0
	P002	1	2	1	0
	P01001	0	0	0	1
	P201	2	0	0	0
	P021	0	1	0	0
	P401	1	0	0	0
	G0002	2	3	5	0
	G22	0	0	0	0
	G10001	1	0	0	0
	G002	2	6	0	0
	G0101	2	1	1	0
	G00101	1	0	0	0
	G03	0	0	0	1
	H003	2	0	0	0
	H0002	2	0	0	0
	H22	0	0	1	0
	N003	1	0	0	0
chelate	B01	129	97	52	16
	T001	54	60	2	0
	K0001	65	34	2	3
	P00001	22	4	0	3

## Sheet: Table S4
Table S5. Distribution of metal atoms over their coordination numbe4
			No of cmpds with a given coordination number
Metal	2	3	4	5	6	7	8	9	10	11	12
Li			1		1
Mg					1
Cr					4
Mn			1	7	205	13
Fe					104	3	2
Co			3	4	156
Ni			8	9	136
Cu	5	29	70	214	90
Zn			29	35	50
Ru				1	9		2
Rh			1
Ag	8	2	11	3	3
Cd				2	127	9
Sn				1	1
W			2		1
Re				2	2
Ir					1
Au	1		1
Hg			1	1
Pb			2		1	2	3	3
Ln					1	1	11	30	1
U				1	1	1

## Sheet: Table S5
Table S5. Distribution of topologies
Dimensionality	Topology	No of cmpds	Dimensionality	Topology	No of cmpds	Dimensionality	Topology	No of cmpds
1D	2C1	248	2D	sql	159	3D	pcu	85
1D	2,4C4	111	2D	hcb	71	3D	dia	28
1D	(4,4)(0,2)	32	2D	3,4,4L13	7	3D	rtl	13
1D	2,6C1	4	2D	hxl	6	3D	bnn	8
1D	3,4C26	3	2D	3,4,5L39	3	3D	mab	7
1D	(3,6)(1,2)	2	2D	bey	3	3D	3,3,9T1	6
1D	(4,4)(2,2)	2	2D	sdd	3	3D	sqp	5
1D	2,4C1	2	2D	cpr	2	3D	3,3,6T12	3
1D	3,5C1	2	2D	kgd	2	3D	qtz	3
1D	3,5C22	2	2D	3,3,3,4,5,5,5L2	1	3D	sqc173	3
1D	(4,4)(4,4)	1	2D	3,4,4,4L43	1	3D	4,5,9T2	2
1D	2,2,3C4	1	2D	3,4,4L112	1	3D	4,6,6T6	2
1D	2,2,3C6	1	2D	3,4,4L48	1	3D	nov	2
1D	2,2,4C3	1	2D	3,4L88	1	3D	rob	2
1D	3,4C35	1	2D	3,4L90	1	3D	3,3,9T1	1
1D	3,4,6C1	1	2D	3,4L99	1	3D	3,3,4,6T6	1
			2D	3,5L2	1	3D	3,3,4T36	1
			2D	3,5L27	1	3D	3,3,6,6T44	1
			2D	3,6L18	1	3D	3,4,6,6T1	1
			2D	bex	1	3D	4,6T43	1
			2D	KIa	1	3D	4,6T594	1
						3D	6T18	1
						3D	acs	1
						3D	cds	1
						3D	dmp	1
						3D	fet	1
						3D	hms	1
						3D	KIb	1
						3D	moc	1
						3D	pTs	1
						3D	seh-3,5-P21/c	1
						3D	sra	1
						3D	sxa;Sqc34	1
						3D	Tcj-4,6-Imma-1	1
						3D	Tck-4,5-Cccm-1	1
						3D	ths	1
						3D	yav	1
